# Supplementary material for: Risk factors associated with the development of seizures among adult patients treated with ertapenem: A matched case-control study
Source: PubMed Central journal article supplement (PMC5536326; doi:10.1371/journal.pone.0182046), 2017-07-31
Supplement: pone.0182046.s001.pdf [file pone.0182046.s001.pdf]

| index | case | gender | age | Hypertension | Diabetes mellitus | Old stroke | Cerebrovascular disease type intracerebral hemorrhage | Cerebrovascular disease type ischemic infarction | Parkinsonism | Dementia | Epilepsy | Heart failure | Coronary artery disease | Peripheral arterial occlusive disease | Cancer | Gout |
|-------|------|--------|-----|--------------|-------------------|------------|-------------------------------------------------------|--------------------------------------------------|--------------|----------|----------|---------------|-------------------------|---------------------------------------|--------|------|
| 1     | 1    | 0      | 76  | 1            | 0                 | 1          | 1                                                     | 0                                                | 0            | 0        | 0        | 0             | 0                       | 0                                     | 0      | 0    |
| 1     | 0    | 0      | 72  | 1            | 0                 | 0          | 0                                                     | 0                                                | 0            | 0        | 0        | 0             | 0                       | 0                                     | 0      | 0    |
| 1     | 0    | 0      | 73  | 1            | 0                 | 0          | 0                                                     | 0                                                | 0            | 0        | 0        | 0             | 0                       | 0                                     | 1      | 0    |
| 1     | 0    | 0      | 73  | 0            | 1                 | 0          | 0                                                     | 0                                                | 0            | 0        | 0        | 0             | 1                       | 0                                     | 1      | 0    |
| 1     | 0    | 0      | 79  | 1            | 0                 | 0          | 0                                                     | 0                                                | 0            | 1        | 0        | 0             | 0                       | 0                                     | 0      | 0    |
| 2     | 1    | 0      | 69  | 1            | 0                 | 1          | 0                                                     | 1                                                | 0            | 0        | 1        | 0             | 0                       | 0                                     | 1      | 0    |
| 2     | 0    | 0      | 70  | 0            | 0                 | 0          | 0                                                     | 0                                                | 0            | 0        | 0        | 0             | 0                       | 0                                     | 0      | 1    |
| 2     | 0    | 0      | 75  | 1            | 0                 | 0          | 0                                                     | 0                                                | 0            | 0        | 0        | 0             | 1                       | 0                                     | 0      | 0    |
| 2     | 0    | 0      | 68  | 1            | 1                 | 0          | 0                                                     | 0                                                | 0            | 0        | 0        | 0             | 0                       | 0                                     | 0      | 0    |
| 2     | 0    | 0      | 69  | 0            | 1                 | 0          | 0                                                     | 0                                                | 0            | 0        | 0        | 0             | 0                       | 0                                     | 0      | 0    |
| 3     | 1    | 1      | 85  | 0            | 0                 | 0          | 0                                                     | 0                                                | 0            | 1        | 0        | 0             | 0                       | 0                                     | 0      | 0    |
| 3     | 0    | 1      | 85  | 1            | 1                 | 0          | 0                                                     | 0                                                | 1            | 1        | 0        | 0             | 0                       | 0                                     | 1      | 0    |
| 3     | 0    | 1      | 87  | 1            | 1                 | 1          | 0                                                     | 1                                                | 1            | 1        | 0        | 0             | 0                       | 1                                     | 0      | 0    |
| 3     | 0    | 1      | 86  | 1            | 1                 | 0          | 0                                                     | 0                                                | 1            | 0        | 1        | 1             | 1                       | 0                                     | 0      | 1    |
| 3     | 0    | 1      | 86  | 0            | 0                 | 1          | 1                                                     | 0                                                | 0            | 0        | 0        | 0             | 0                       | 0                                     | 0      | 0    |
| 4     | 1    | 0      | 89  | 1            | 0                 | 1          | 0                                                     | 1                                                | 1            | 0        | 0        | 0             | 0                       | 0                                     | 1      | 1    |
| 4     | 0    | 0      | 90  | 1            | 0                 | 0          | 0                                                     | 0                                                | 0            | 1        | 0        | 0             | 0                       | 0                                     | 1      | 0    |
| 4     | 0    | 0      | 86  | 1            | 0                 | 0          | 0                                                     | 0                                                | 0            | 0        | 0        | 0             | 0                       | 0                                     | 0      | 0    |
| 4     | 0    | 0      | 86  | 1            | 1                 | 1          | 1                                                     | 0                                                | 0            | 0        | 0        | 1             | 0                       | 0                                     | 0      | 0    |
| 4     | 0    | 0      | 87  | 1            | 0                 | 0          | 0                                                     | 0                                                | 0            | 0        | 0        | 0             | 0                       | 0                                     | 0      | 0    |
| 5     | 1    | 1      | 84  | 0            | 0                 | 0          | 0                                                     | 0                                                | 0            | 0        | 0        | 0             | 0                       | 0                                     | 1      | 0    |
| 5     | 0    | 1      | 83  | 1            | 0                 | 0          | 0                                                     | 0                                                | 0            | 0        | 0        | 0             | 0                       | 0                                     | 0      | 0    |
| 5     | 0    | 1      | 86  | 1            | 0                 | 0          | 0                                                     | 0                                                | 0            | 1        | 0        | 0             | 0                       | 0                                     | 0      | 1    |
| 5     | 0    | 1      | 83  | 1            | 0                 | 0          | 0                                                     | 0                                                | 0            | 0        | 0        | 0             | 0                       | 0                                     | 1      | 0    |
| 5     | 0    | 1      | 83  | 0            | 0                 | 0          | 0                                                     | 0                                                | 0            | 0        | 0        | 0             | 0                       | 0                                     | 1      | 0    |
| 6     | 1    | 1      | 87  | 1            | 1                 | 0          | 0                                                     | 0                                                | 0            | 0        | 0        | 0             | 0                       | 0                                     | 1      | 0    |
| 6     | 0    | 1      | 82  | 0            | 0                 | 1          | 0                                                     | 1                                                | 0            | 0        | 0        | 0             | 0                       | 0                                     | 0      | 0    |
| 6     | 0    | 1      | 91  | 0            | 0                 | 1          | 1                                                     | 0                                                | 0            | 0        | 0        | 0             | 0                       | 0                                     | 0      | 0    |
| 6     | 0    | 1      | 86  | 0            | 0                 | 0          | 0                                                     | 0                                                | 0            | 0        | 0        | 0             | 1                       | 1                                     | 0      | 0    |
| 6     | 0    | 1      | 90  | 0            | 1                 | 1          | 0                                                     | 1                                                | 0            | 0        | 0        | 0             | 0                       | 0                                     | 0      | 0    |
| 7     | 1    | 1      | 80  | 0            | 0                 | 0          | 0                                                     | 0                                                | 0            | 1        | 0        | 0             | 0                       | 0                                     | 0      | 0    |
| 7     | 0    | 1      | 82  | 0            | 0                 | 0          | 0                                                     | 0                                                | 0            | 0        | 0        | 0             | 0                       | 0                                     | 0      | 0    |
| 7     | 0    | 1      | 81  | 1            | 0                 | 0          | 0                                                     | 0                                                | 0            | 0        | 0        | 0             | 1                       | 0                                     | 0      | 0    |
| 7     | 0    | 1      | 83  | 0            | 0                 | 1          | 1                                                     | 0                                                | 0            | 0        | 0        | 0             | 0                       | 0                                     | 0      | 0    |
| 7     | 0    | 1      | 75  | 1            | 0                 | 0          | 0                                                     | 0                                                | 0            | 0        | 0        | 0             | 0                       | 0                                     | 0      | 0    |
| 8     | 1    | 1      | 81  | 1            | 1                 | 1          | 1                                                     | 0                                                | 0            | 0        | 0        | 0             | 0                       | 0                                     | 1      | 0    |
| 8     | 0    | 1      | 83  | 0            | 1                 | 0          | 0                                                     | 0                                                | 0            | 0        | 0        | 1             | 0                       | 0                                     | 0      | 1    |
| 8     | 0    | 1      | 86  | 0            | 0                 | 0          | 0                                                     | 0                                                | 0            | 0        | 0        | 0             | 0                       | 0                                     | 0      | 0    |
| 8     | 0    | 1      | 86  | 0            | 0                 | 0          | 0                                                     | 0                                                | 1            | 0        | 0        | 0             | 0                       | 0                                     | 0      | 0    |





|    |   |   |    |   |   |   |   |   |   |   |   |   |   |   |   |   |
|----|---|---|----|---|---|---|---|---|---|---|---|---|---|---|---|---|
| 25 | 0 | 1 | 74 | 1 | 1 | 0 | 0 | 0 | 1 | 0 | 0 | 1 | 1 | 1 | 0 | 1 |
| 25 | 0 | 1 | 76 | 0 | 0 | 0 | 0 | 0 | 0 | 0 | 0 | 0 | 0 | 0 | 1 | 0 |
| 26 | 1 | 1 | 77 | 1 | 0 | 0 | 0 | 0 | 0 | 0 | 0 | 0 | 0 | 0 | 1 | 0 |
| 26 | 0 | 1 | 81 | 1 | 1 | 0 | 0 | 0 | 0 | 0 | 0 | 0 | 0 | 0 | 1 | 0 |
| 26 | 0 | 1 | 80 | 1 | 1 | 0 | 0 | 0 | 0 | 0 | 0 | 0 | 0 | 0 | 0 | 0 |
| 26 | 0 | 1 | 76 | 0 | 0 | 0 | 0 | 0 | 0 | 0 | 0 | 0 | 0 | 0 | 0 | 0 |
| 26 | 0 | 1 | 79 | 1 | 1 | 1 | 0 | 1 | 0 | 1 | 0 | 0 | 0 | 0 | 0 | 0 |
| 27 | 1 | 1 | 74 | 1 | 1 | 1 | 0 | 1 | 0 | 0 | 0 | 0 | 0 | 0 | 0 | 0 |
| 27 | 0 | 1 | 79 | 0 | 0 | 0 | 0 | 0 | 0 | 0 | 0 | 0 | 0 | 0 | 0 | 0 |
| 27 | 0 | 1 | 78 | 1 | 1 | 0 | 0 | 0 | 1 | 1 | 0 | 0 | 1 | 0 | 0 | 0 |
| 27 | 0 | 1 | 79 | 1 | 0 | 0 | 0 | 0 | 0 | 0 | 0 | 0 | 0 | 0 | 0 | 0 |
| 27 | 0 | 1 | 79 | 1 | 0 | 0 | 0 | 0 | 0 | 0 | 0 | 0 | 0 | 0 | 0 | 0 |
| 28 | 1 | 1 | 69 | 1 | 1 | 1 | 0 | 1 | 1 | 1 | 0 | 0 | 0 | 0 | 0 | 0 |
| 28 | 0 | 1 | 67 | 0 | 0 | 0 | 0 | 0 | 0 | 0 | 0 | 1 | 1 | 0 | 0 | 0 |
| 28 | 0 | 1 | 64 | 1 | 1 | 1 | 0 | 1 | 0 | 0 | 0 | 0 | 1 | 0 | 0 | 0 |
| 28 | 0 | 1 | 65 | 1 | 1 | 0 | 0 | 0 | 0 | 0 | 0 | 1 | 1 | 0 | 0 | 0 |
| 28 | 0 | 1 | 68 | 1 | 1 | 0 | 0 | 0 | 0 | 0 | 0 | 0 | 0 | 0 | 0 | 0 |
| 29 | 1 | 1 | 75 | 1 | 1 | 1 | 0 | 1 | 0 | 0 | 0 | 0 | 1 | 0 | 0 | 0 |
| 29 | 0 | 1 | 70 | 1 | 1 | 0 | 0 | 0 | 0 | 0 | 0 | 0 | 0 | 0 | 0 | 0 |
| 29 | 0 | 1 | 72 | 0 | 1 | 0 | 0 | 0 | 0 | 0 | 0 | 0 | 1 | 0 | 0 | 0 |
| 29 | 0 | 1 | 71 | 1 | 1 | 0 | 0 | 0 | 0 | 0 | 0 | 0 | 0 | 0 | 0 | 0 |
| 29 | 0 | 1 | 80 | 1 | 1 | 0 | 0 | 0 | 0 | 0 | 0 | 0 | 0 | 0 | 0 | 0 |
| 30 | 1 | 1 | 85 | 1 | 1 | 1 | 1 | 0 | 0 | 1 | 1 | 0 | 0 | 0 | 0 | 0 |
| 30 | 0 | 1 | 81 | 1 | 1 | 0 | 0 | 0 | 0 | 0 | 0 | 0 | 0 | 1 | 0 | 0 |
| 30 | 0 | 1 | 88 | 0 | 1 | 1 | 0 | 1 | 0 | 1 | 0 | 0 | 0 | 0 | 0 | 0 |
| 30 | 0 | 1 | 86 | 1 | 0 | 1 | 0 | 1 | 1 | 1 | 0 | 1 | 0 | 0 | 0 | 0 |
| 30 | 0 | 1 | 80 | 1 | 0 | 0 | 0 | 0 | 0 | 0 | 0 | 0 | 0 | 0 | 1 | 0 |
| 31 | 1 | 0 | 84 | 0 | 1 | 1 | 0 | 1 | 0 | 0 | 1 | 1 | 0 | 0 | 0 | 0 |
| 31 | 0 | 0 | 89 | 1 | 1 | 0 | 0 | 0 | 1 | 0 | 0 | 1 | 0 | 0 | 0 | 0 |
| 31 | 0 | 0 | 82 | 1 | 0 | 0 | 0 | 0 | 0 | 0 | 0 | 0 | 0 | 0 | 0 | 0 |
| 31 | 0 | 0 | 85 | 1 | 1 | 0 | 0 | 0 | 0 | 1 | 0 | 0 | 0 | 0 | 0 | 1 |
| 31 | 0 | 0 | 88 | 1 | 1 | 0 | 0 | 0 | 0 | 1 | 0 | 0 | 0 | 0 | 0 | 0 |
| 32 | 1 | 1 | 72 | 1 | 0 | 1 | 1 | 0 | 0 | 0 | 0 | 0 | 0 | 0 | 1 | 0 |
| 32 | 0 | 1 | 70 | 1 | 1 | 1 | 0 | 1 | 0 | 0 | 0 | 0 | 1 | 0 | 0 | 0 |
| 32 | 0 | 1 | 75 | 1 | 1 | 0 | 0 | 0 | 0 | 0 | 0 | 0 | 0 | 0 | 0 | 0 |
| 32 | 0 | 1 | 77 | 1 | 0 | 0 | 0 | 0 | 0 | 0 | 0 | 1 | 1 | 0 | 0 | 1 |
| 32 | 0 | 1 | 75 | 0 | 0 | 0 | 0 | 0 | 0 | 0 | 0 | 0 | 0 | 0 | 0 | 0 |
| 33 | 1 | 0 | 90 | 1 | 1 | 1 | 0 | 1 | 0 | 1 | 0 | 0 | 0 | 0 | 0 | 0 |
| 33 | 0 | 0 | 91 | 1 | 1 | 1 | 0 | 1 | 0 | 0 | 0 | 0 | 1 | 0 | 1 | 0 |
| 33 | 0 | 0 | 92 | 0 | 0 | 0 | 0 | 0 | 0 | 1 | 0 | 0 | 0 | 0 | 0 | 0 |
| 33 | 0 | 0 | 83 | 1 | 1 | 1 | 0 | 1 | 0 | 1 | 0 | 0 | 0 | 0 | 0 | 0 |
| 33 | 0 | 0 | 85 | 1 | 0 | 0 | 0 | 0 | 0 | 0 | 0 | 1 | 1 | 0 | 0 | 0 |

| Liver cirrhosis | Chronic obstructive pulmonary disease | Peptic ulcer disease | Chronic kidney disease | End stage renal disease | Charlson score | Brain image within one year prior to this | Brain image Intracranial hemorrhage | Brain image Infarction | Brain image Hydrocephalus | Brain image Chronic subdural effusion | Brain image Meningioma | Initial vital signs conscious change | Systolic blood pressure |
|-----------------|---------------------------------------|----------------------|------------------------|-------------------------|----------------|-------------------------------------------|-------------------------------------|------------------------|---------------------------|---------------------------------------|------------------------|--------------------------------------|-------------------------|
| 1               | 0                                     | 1                    | 0                      | 0                       | 6              | 1                                         | 1                                   | 0                      | 0                         | 0                                     | 0                      | 1                                    | 142                     |
| 0               | 0                                     | 0                    | 0                      | 0                       | 0              | 0                                         | 0                                   | 0                      | 0                         | 0                                     | 0                      | 0                                    | 182                     |
| 0               | 0                                     | 1                    | 1                      | 1                       | 11             | 0                                         | 0                                   | 0                      | 0                         | 0                                     | 0                      | 0                                    | 117                     |
| 0               | 0                                     | 1                    | 0                      | 0                       | 4              | 0                                         | 0                                   | 0                      | 0                         | 0                                     | 0                      | 0                                    | 140                     |
| 0               | 0                                     | 0                    | 1                      | 1                       | 3              | 0                                         | 0                                   | 0                      | 0                         | 0                                     | 0                      | 0                                    | 157                     |
| 0               | 0                                     | 1                    | 1                      | 1                       | 10             | 1                                         | 0                                   | 1                      | 0                         | 0                                     | 0                      | 0                                    | 164                     |
| 0               | 0                                     | 0                    | 0                      | 0                       | 1              | 0                                         | 0                                   | 0                      | 0                         | 0                                     | 0                      | 0                                    | 68                      |
| 0               | 0                                     | 0                    | 1                      | 1                       | 3              | 0                                         | 0                                   | 0                      | 0                         | 0                                     | 0                      | 0                                    | 118                     |
| 1               | 0                                     | 0                    | 0                      | 0                       | 4              | 0                                         | 0                                   | 0                      | 0                         | 0                                     | 0                      | 0                                    | 118                     |
| 0               | 0                                     | 0                    | 0                      | 0                       | 2              | 0                                         | 0                                   | 0                      | 0                         | 0                                     | 0                      | 0                                    | 161                     |
| 0               | 1                                     | 0                    | 0                      | 0                       | 2              | 1                                         | 0                                   | 1                      | 0                         | 0                                     | 0                      | 0                                    | 144                     |
| 1               | 0                                     | 0                    | 0                      | 0                       | 6              | 1                                         | 0                                   | 0                      | 1                         | 0                                     | 0                      | 0                                    | 161                     |
| 0               | 1                                     | 0                    | 0                      | 0                       | 6              | 0                                         | 0                                   | 0                      | 0                         | 0                                     | 0                      | 0                                    | 130                     |
| 0               | 0                                     | 0                    | 0                      | 0                       | 4              | 1                                         | 0                                   | 1                      | 1                         | 0                                     | 0                      | 1                                    | 96                      |
| 0               | 0                                     | 0                    | 0                      | 0                       | 2              | 0                                         | 0                                   | 0                      | 0                         | 0                                     | 0                      | 0                                    | 129                     |
| 0               | 0                                     | 1                    | 1                      | 1                       | 7              | 1                                         | 0                                   | 1                      | 0                         | 0                                     | 0                      | 0                                    | 115                     |
| 0               | 0                                     | 0                    | 0                      | 0                       | 7              | 0                                         | 0                                   | 0                      | 0                         | 0                                     | 0                      | 0                                    | 82                      |
| 1               | 0                                     | 1                    | 0                      | 0                       | 2              | 0                                         | 0                                   | 0                      | 0                         | 0                                     | 0                      | 0                                    | 119                     |
| 0               | 0                                     | 0                    | 0                      | 0                       | 5              | 1                                         | 0                                   | 0                      | 1                         | 0                                     | 0                      | 1                                    | 134                     |
| 0               | 0                                     | 1                    | 1                      | 1                       | 3              | 0                                         | 0                                   | 0                      | 0                         | 0                                     | 0                      | 1                                    | 138                     |
| 1               | 0                                     | 1                    | 0                      | 0                       | 8              | 1                                         | 0                                   | 1                      | 1                         | 0                                     | 0                      | 0                                    | 128                     |
| 0               | 0                                     | 1                    | 1                      | 0                       | 1              | 0                                         | 0                                   | 0                      | 0                         | 0                                     | 0                      | 0                                    | 170                     |
| 0               | 0                                     | 0                    | 1                      | 0                       | 1              | 1                                         | 0                                   | 1                      | 1                         | 0                                     | 0                      | 0                                    | 156                     |
| 0               | 0                                     | 1                    | 0                      | 0                       | 7              | 1                                         | 1                                   | 0                      | 0                         | 0                                     | 0                      | 0                                    | 161                     |
| 0               | 0                                     | 0                    | 0                      | 0                       | 2              | 0                                         | 0                                   | 0                      | 0                         | 0                                     | 0                      | 0                                    | 102                     |
| 0               | 0                                     | 0                    | 1                      | 0                       | 6              | 0                                         | 0                                   | 0                      | 0                         | 0                                     | 0                      | 0                                    | 122                     |
| 0               | 0                                     | 0                    | 0                      | 0                       | 1              | 0                                         | 0                                   | 0                      | 0                         | 0                                     | 0                      | 0                                    | 125                     |
| 0               | 1                                     | 0                    | 0                      | 0                       | 3              | 0                                         | 0                                   | 0                      | 0                         | 0                                     | 0                      | 0                                    | 131                     |
| 0               | 0                                     | 1                    | 0                      | 0                       | 3              | 0                                         | 0                                   | 0                      | 0                         | 0                                     | 0                      | 1                                    | 70                      |
| 0               | 0                                     | 0                    | 0                      | 0                       | 3              | 0                                         | 0                                   | 0                      | 0                         | 0                                     | 0                      | 0                                    | 149                     |
| 0               | 0                                     | 0                    | 0                      | 0                       | 1              | 1                                         | 0                                   | 1                      | 1                         | 0                                     | 0                      | 0                                    | 124                     |
| 0               | 0                                     | 0                    | 0                      | 0                       | 0              | 0                                         | 0                                   | 0                      | 0                         | 0                                     | 0                      | 0                                    | 143                     |
| 0               | 0                                     | 1                    | 0                      | 0                       | 2              | 0                                         | 0                                   | 0                      | 0                         | 0                                     | 0                      | 0                                    | 149                     |
| 0               | 1                                     | 1                    | 0                      | 0                       | 4              | 0                                         | 0                                   | 0                      | 0                         | 0                                     | 0                      | 1                                    | 112                     |
| 0               | 0                                     | 1                    | 0                      | 0                       | 1              | 0                                         | 0                                   | 0                      | 0                         | 0                                     | 0                      | 0                                    | 102                     |
| 0               | 0                                     | 0                    | 0                      | 0                       | 6              | 0                                         | 0                                   | 0                      | 0                         | 0                                     | 0                      | 0                                    | 142                     |
| 0               | 1                                     | 1                    | 1                      | 0                       | 3              | 0                                         | 0                                   | 0                      | 0                         | 0                                     | 0                      | 0                                    | 147                     |
| 0               | 0                                     | 0                    | 0                      | 0                       | 0              | 0                                         | 0                                   | 0                      | 0                         | 0                                     | 0                      | 0                                    | 94                      |
| 1               | 1                                     | 0                    | 0                      | 0                       | 2              | 1                                         | 0                                   | 0                      | 0                         | 1                                     | 0                      | 0                                    | 165                     |

|   |   |   |   |   |   |   |   |   |   |   |   |   |     |
|---|---|---|---|---|---|---|---|---|---|---|---|---|-----|
| 0 | 0 | 1 | 0 | 0 | 7 | 0 | 0 | 0 | 0 | 0 | 0 | 0 | 157 |
| 0 | 0 | 0 | 0 | 0 | 3 | 0 | 0 | 0 | 0 | 0 | 0 | 0 | 102 |
| 0 | 1 | 0 | 0 | 0 | 7 | 0 | 0 | 0 | 0 | 0 | 0 | 0 | 144 |
| 0 | 0 | 0 | 0 | 0 | 1 | 0 | 0 | 0 | 0 | 0 | 0 | 0 | 128 |
| 0 | 0 | 0 | 1 | 1 | 2 | 0 | 0 | 0 | 0 | 0 | 0 | 1 | 114 |
| 0 | 1 | 0 | 0 | 0 | 4 | 0 | 0 | 0 | 0 | 0 | 0 | 0 | 91  |
| 0 | 0 | 0 | 0 | 0 | 2 | 1 | 0 | 0 | 1 | 0 | 0 | 1 | 144 |
| 0 | 0 | 1 | 1 | 0 | 1 | 0 | 0 | 0 | 0 | 0 | 0 | 0 | 99  |
| 0 | 1 | 0 | 0 | 0 | 3 | 0 | 0 | 0 | 0 | 0 | 0 | 0 | 121 |
| 0 | 0 | 1 | 1 | 0 | 4 | 1 | 0 | 1 | 0 | 0 | 0 | 0 | 189 |
| 0 | 0 | 1 | 0 | 0 | 2 | 0 | 0 | 0 | 0 | 0 | 0 | 0 | 138 |
| 0 | 0 | 0 | 0 | 0 | 1 | 0 | 0 | 0 | 0 | 0 | 0 | 0 | 182 |
| 0 | 0 | 0 | 0 | 0 | 4 | 1 | 0 | 1 | 0 | 0 | 0 | 0 | 102 |
| 0 | 0 | 1 | 0 | 0 | 9 | 0 | 0 | 0 | 0 | 0 | 0 | 0 | 80  |
| 1 | 0 | 1 | 0 | 0 | 4 | 0 | 0 | 0 | 0 | 0 | 0 | 0 | 140 |
| 0 | 0 | 0 | 0 | 0 | 6 | 0 | 0 | 0 | 0 | 0 | 0 | 0 | 147 |
| 0 | 0 | 0 | 0 | 0 | 5 | 1 | 0 | 1 | 1 | 0 | 0 | 0 | 148 |
| 0 | 0 | 0 | 0 | 0 | 0 | 0 | 0 | 0 | 0 | 0 | 0 | 0 | 82  |
| 0 | 0 | 1 | 1 | 1 | 5 | 0 | 0 | 0 | 0 | 0 | 0 | 0 | 213 |
| 1 | 0 | 0 | 0 | 0 | 7 | 0 | 0 | 0 | 0 | 0 | 0 | 0 | 113 |
| 0 | 0 | 0 | 0 | 0 | 8 | 0 | 0 | 0 | 0 | 0 | 0 | 0 | 171 |
| 0 | 0 | 0 | 0 | 0 | 4 | 1 | 0 | 1 | 1 | 0 | 0 | 0 | 124 |
| 0 | 1 | 0 | 0 | 0 | 1 | 0 | 0 | 0 | 0 | 0 | 0 | 0 | 137 |
| 0 | 0 | 1 | 1 | 0 | 4 | 1 | 0 | 0 | 1 | 0 | 0 | 0 | 86  |
| 0 | 0 | 1 | 0 | 0 | 2 | 0 | 0 | 0 | 0 | 0 | 0 | 0 | 162 |
| 0 | 0 | 0 | 0 | 0 | 1 | 1 | 0 | 1 | 0 | 0 | 0 | 0 | 152 |
| 0 | 0 | 1 | 1 | 0 | 5 | 0 | 0 | 0 | 0 | 0 | 0 | 0 | 95  |
| 0 | 0 | 0 | 0 | 0 | 8 | 0 | 0 | 0 | 0 | 0 | 0 | 0 | 153 |
| 0 | 0 | 0 | 1 | 0 | 1 | 0 | 0 | 0 | 0 | 0 | 0 | 1 | 102 |
| 0 | 0 | 0 | 0 | 0 | 3 | 0 | 0 | 0 | 0 | 0 | 0 | 0 | 107 |
| 0 | 0 | 0 | 1 | 0 | 0 | 0 | 0 | 0 | 0 | 0 | 0 | 0 | 148 |
| 0 | 0 | 0 | 0 | 0 | 2 | 0 | 0 | 0 | 0 | 0 | 0 | 1 | 131 |
| 0 | 0 | 1 | 0 | 0 | 4 | 0 | 0 | 0 | 0 | 0 | 0 | 0 | 138 |
| 0 | 0 | 0 | 0 | 0 | 2 | 1 | 0 | 1 | 0 | 0 | 0 | 0 | 134 |
| 0 | 1 | 0 | 1 | 0 | 4 | 0 | 0 | 0 | 0 | 0 | 0 | 0 | 146 |
| 0 | 0 | 1 | 0 | 0 | 3 | 0 | 0 | 0 | 0 | 0 | 0 | 0 | 107 |
| 1 | 0 | 1 | 1 | 0 | 7 | 0 | 0 | 0 | 0 | 0 | 0 | 0 | 109 |
| 0 | 0 | 1 | 1 | 0 | 4 | 1 | 0 | 1 | 1 | 0 | 0 | 0 | 204 |
| 0 | 0 | 0 | 0 | 0 | 4 | 0 | 0 | 0 | 0 | 0 | 0 | 0 | 157 |
| 0 | 0 | 0 | 0 | 0 | 0 | 0 | 0 | 0 | 0 | 0 | 0 | 0 | 110 |
| 0 | 0 | 0 | 1 | 0 | 3 | 1 | 0 | 1 | 1 | 0 | 0 | 0 | 225 |
| 1 | 0 | 1 | 0 | 0 | 6 | 0 | 0 | 0 | 0 | 0 | 0 | 0 | 149 |

|   |   |   |   |   |    |   |   |   |   |   |   |   |     |
|---|---|---|---|---|----|---|---|---|---|---|---|---|-----|
| 0 | 0 | 1 | 1 | 1 | 3  | 0 | 0 | 0 | 0 | 0 | 0 | 0 | 87  |
| 0 | 0 | 0 | 1 | 0 | 4  | 0 | 0 | 0 | 0 | 0 | 0 | 0 | 154 |
| 1 | 0 | 0 | 1 | 1 | 7  | 0 | 0 | 0 | 0 | 0 | 0 | 0 | 179 |
| 0 | 0 | 0 | 0 | 0 | 0  | 0 | 0 | 0 | 0 | 0 | 0 | 0 | 113 |
| 1 | 0 | 1 | 1 | 0 | 8  | 0 | 0 | 0 | 0 | 0 | 0 | 1 | 133 |
| 1 | 0 | 0 | 0 | 0 | 11 | 0 | 0 | 0 | 0 | 0 | 0 | 0 | 92  |
| 1 | 0 | 0 | 0 | 0 | 7  | 0 | 0 | 0 | 0 | 0 | 0 | 0 | 161 |
| 0 | 0 | 1 | 0 | 0 | 3  | 0 | 0 | 0 | 0 | 0 | 0 | 0 | 167 |
| 1 | 0 | 0 | 0 | 0 | 1  | 0 | 0 | 0 | 0 | 0 | 0 | 0 | 163 |
| 0 | 0 | 0 | 0 | 0 | 2  | 0 | 0 | 0 | 0 | 0 | 0 | 0 | 138 |
| 1 | 0 | 1 | 1 | 0 | 6  | 0 | 0 | 0 | 0 | 0 | 0 | 0 | 134 |
| 0 | 0 | 0 | 1 | 1 | 8  | 0 | 0 | 0 | 0 | 0 | 0 | 0 | 100 |
| 0 | 0 | 0 | 0 | 0 | 5  | 1 | 0 | 1 | 0 | 0 | 0 | 0 | 160 |
| 0 | 0 | 0 | 0 | 0 | 2  | 1 | 0 | 1 | 1 | 0 | 0 | 1 | 96  |
| 0 | 0 | 0 | 1 | 0 | 1  | 1 | 1 | 1 | 0 | 0 | 0 | 1 | 164 |
| 0 | 0 | 1 | 0 | 0 | 4  | 0 | 0 | 0 | 0 | 0 | 0 | 0 | 158 |
| 0 | 0 | 0 | 0 | 0 | 3  | 0 | 0 | 0 | 0 | 0 | 0 | 1 | 170 |
| 0 | 0 | 0 | 0 | 0 | 2  | 0 | 0 | 0 | 0 | 0 | 0 | 1 | 106 |
| 1 | 0 | 1 | 0 | 0 | 5  | 0 | 0 | 0 | 0 | 0 | 0 | 0 | 97  |
| 0 | 0 | 0 | 0 | 0 | 3  | 1 | 0 | 1 | 1 | 0 | 0 | 0 | 168 |
| 0 | 0 | 0 | 0 | 0 | 4  | 1 | 0 | 1 | 0 | 0 | 0 | 0 | 108 |
| 0 | 0 | 0 | 0 | 0 | 2  | 0 | 0 | 0 | 0 | 0 | 0 | 0 | 152 |
| 0 | 0 | 0 | 0 | 0 | 1  | 0 | 0 | 0 | 0 | 0 | 0 | 1 | 117 |
| 0 | 0 | 0 | 0 | 0 | 1  | 0 | 0 | 0 | 0 | 0 | 0 | 0 | 167 |
| 0 | 0 | 0 | 0 | 0 | 1  | 1 | 0 | 1 | 1 | 0 | 0 | 1 | 197 |
| 0 | 0 | 0 | 0 | 0 | 3  | 1 | 0 | 1 | 1 | 0 | 0 | 1 | 100 |
| 0 | 0 | 0 | 0 | 0 | 3  | 0 | 0 | 0 | 0 | 0 | 0 | 0 | 154 |
| 0 | 0 | 0 | 1 | 1 | 2  | 1 | 0 | 1 | 0 | 0 | 0 | 1 | 157 |
| 0 | 0 | 0 | 1 | 1 | 5  | 0 | 0 | 0 | 0 | 0 | 0 | 1 | 158 |
| 0 | 0 | 1 | 0 | 0 | 4  | 0 | 0 | 0 | 0 | 0 | 0 | 0 | 97  |
| 0 | 0 | 1 | 0 | 0 | 2  | 0 | 0 | 0 | 0 | 0 | 0 | 0 | 83  |
| 0 | 0 | 1 | 0 | 0 | 2  | 1 | 0 | 1 | 0 | 0 | 0 | 0 | 195 |
| 0 | 0 | 0 | 0 | 0 | 2  | 1 | 0 | 1 | 0 | 0 | 0 | 0 | 87  |
| 0 | 0 | 0 | 0 | 0 | 1  | 0 | 0 | 0 | 0 | 0 | 0 | 0 | 158 |
| 0 | 0 | 0 | 0 | 0 | 2  | 0 | 0 | 0 | 0 | 0 | 0 | 0 | 114 |
| 0 | 0 | 0 | 0 | 0 | 2  | 0 | 0 | 0 | 0 | 0 | 0 | 0 | 170 |
| 0 | 0 | 0 | 0 | 0 | 0  | 0 | 0 | 0 | 0 | 0 | 0 | 0 | 106 |
| 0 | 0 | 0 | 0 | 0 | 2  | 1 | 0 | 1 | 0 | 0 | 0 | 1 | 98  |
| 0 | 0 | 0 | 0 | 0 | 0  | 0 | 0 | 0 | 0 | 0 | 0 | 0 | 148 |
| 0 | 0 | 0 | 0 | 0 | 4  | 0 | 0 | 0 | 0 | 0 | 0 | 0 | 130 |
| 0 | 0 | 1 | 0 | 0 | 4  | 0 | 0 | 0 | 0 | 0 | 0 | 0 | 109 |
| 0 | 0 | 1 | 0 | 0 | 7  | 0 | 0 | 0 | 0 | 0 | 0 | 0 | 99  |

|   |   |   |   |   |    |   |   |   |   |   |   |   |     |
|---|---|---|---|---|----|---|---|---|---|---|---|---|-----|
| 0 | 0 | 0 | 1 | 0 | 6  | 0 | 0 | 0 | 0 | 0 | 0 | 0 | 153 |
| 1 | 0 | 0 | 0 | 0 | 3  | 0 | 0 | 0 | 0 | 0 | 0 | 0 | 110 |
| 1 | 0 | 0 | 1 | 0 | 9  | 0 | 0 | 0 | 0 | 0 | 0 | 0 | 175 |
| 0 | 1 | 1 | 1 | 0 | 6  | 0 | 0 | 0 | 0 | 0 | 0 | 0 | 132 |
| 0 | 1 | 0 | 0 | 0 | 2  | 1 | 0 | 1 | 0 | 0 | 0 | 0 | 198 |
| 0 | 1 | 0 | 0 | 0 | 1  | 0 | 0 | 0 | 0 | 0 | 0 | 0 | 159 |
| 0 | 0 | 1 | 0 | 0 | 6  | 0 | 0 | 0 | 0 | 0 | 0 | 0 | 105 |
| 0 | 0 | 0 | 1 | 0 | 5  | 1 | 0 | 1 | 0 | 0 | 0 | 0 | 148 |
| 0 | 0 | 0 | 0 | 0 | 0  | 0 | 0 | 0 | 0 | 0 | 0 | 0 | 106 |
| 0 | 1 | 0 | 0 | 0 | 3  | 0 | 0 | 0 | 0 | 0 | 0 | 0 | 111 |
| 0 | 0 | 0 | 0 | 0 | 0  | 0 | 0 | 0 | 0 | 0 | 0 | 0 | 113 |
| 0 | 0 | 0 | 0 | 0 | 0  | 0 | 0 | 0 | 0 | 0 | 0 | 0 | 115 |
| 0 | 0 | 0 | 0 | 0 | 4  | 0 | 0 | 0 | 0 | 0 | 0 | 0 | 111 |
| 0 | 0 | 0 | 0 | 0 | 2  | 0 | 0 | 0 | 0 | 0 | 0 | 0 | 141 |
| 0 | 0 | 1 | 1 | 0 | 7  | 1 | 0 | 1 | 1 | 0 | 0 | 0 | 162 |
| 0 | 0 | 0 | 1 | 0 | 6  | 0 | 0 | 0 | 0 | 0 | 0 | 0 | 139 |
| 0 | 0 | 0 | 0 | 0 | 1  | 1 | 0 | 1 | 0 | 0 | 0 | 0 | 138 |
| 0 | 0 | 0 | 0 | 0 | 3  | 1 | 0 | 1 | 1 | 0 | 0 | 0 | 109 |
| 0 | 0 | 0 | 0 | 0 | 1  | 0 | 0 | 0 | 0 | 0 | 0 | 0 | 210 |
| 0 | 0 | 0 | 1 | 0 | 4  | 0 | 0 | 0 | 0 | 0 | 0 | 0 | 112 |
| 0 | 0 | 0 | 0 | 0 | 1  | 0 | 0 | 0 | 0 | 0 | 0 | 0 | 160 |
| 0 | 0 | 0 | 1 | 0 | 3  | 0 | 0 | 0 | 0 | 0 | 0 | 0 | 150 |
| 0 | 0 | 1 | 0 | 0 | 6  | 0 | 0 | 0 | 0 | 0 | 0 | 0 | 122 |
| 0 | 0 | 0 | 0 | 0 | 3  | 0 | 0 | 0 | 0 | 0 | 0 | 0 | 135 |
| 0 | 1 | 1 | 0 | 0 | 7  | 0 | 0 | 0 | 0 | 0 | 0 | 0 | 107 |
| 0 | 0 | 0 | 0 | 0 | 4  | 1 | 0 | 1 | 1 | 0 | 0 | 0 | 114 |
| 0 | 1 | 1 | 0 | 0 | 8  | 1 | 0 | 1 | 0 | 0 | 0 | 0 | 85  |
| 0 | 0 | 1 | 0 | 0 | 6  | 1 | 0 | 1 | 1 | 0 | 0 | 1 | 95  |
| 0 | 0 | 1 | 0 | 0 | 4  | 0 | 0 | 0 | 0 | 0 | 0 | 1 | 92  |
| 1 | 0 | 1 | 0 | 0 | 2  | 0 | 0 | 0 | 0 | 0 | 0 | 0 | 140 |
| 0 | 0 | 0 | 0 | 0 | 2  | 0 | 0 | 0 | 0 | 0 | 0 | 0 | 159 |
| 0 | 1 | 1 | 0 | 0 | 4  | 0 | 0 | 0 | 0 | 0 | 0 | 0 | 91  |
| 0 | 0 | 0 | 0 | 0 | 4  | 0 | 0 | 0 | 0 | 0 | 0 | 0 | 142 |
| 0 | 0 | 0 | 0 | 0 | 5  | 0 | 0 | 0 | 0 | 0 | 0 | 0 | 175 |
| 0 | 0 | 0 | 0 | 0 | 2  | 0 | 0 | 0 | 0 | 0 | 0 | 0 | 135 |
| 0 | 0 | 1 | 1 | 0 | 5  | 1 | 0 | 1 | 0 | 0 | 0 | 1 | 117 |
| 0 | 0 | 1 | 0 | 0 | 1  | 0 | 0 | 0 | 0 | 0 | 0 | 0 | 109 |
| 0 | 0 | 0 | 0 | 0 | 5  | 1 | 0 | 1 | 0 | 0 | 0 | 1 | 208 |
| 0 | 0 | 1 | 0 | 0 | 11 | 0 | 0 | 0 | 0 | 0 | 0 | 1 | 140 |
| 0 | 0 | 1 | 0 | 0 | 2  | 0 | 0 | 0 | 0 | 0 | 0 | 1 | 118 |
| 0 | 0 | 0 | 0 | 0 | 5  | 1 | 0 | 1 | 1 | 0 | 1 | 1 | 117 |
| 0 | 0 | 1 | 0 | 0 | 3  | 0 | 0 | 0 | 0 | 0 | 0 | 0 | 133 |



| Diastolic blood pressure | Heart rate | Body temperature | Respiratory rate | Initial lab data<br>Blood sugar | White blood count | White blood count < 4000 or > 11000 | Hemoglobin | Hemoglobin < 11 | Platelet | Platelet < 150k | C-reactive protein | Aspartate aminotransferase | Alanine aminotransferase |
|--------------------------|------------|------------------|------------------|---------------------------------|-------------------|-------------------------------------|------------|-----------------|----------|-----------------|--------------------|----------------------------|--------------------------|
| 83                       | 87         | 34.9             | 20               | 35                              | 16380             | 1                                   | 6.9        | 1               | 72       | 1               |                    | 445                        | 269                      |
| 80                       | 104        | 36               | 26               | 105                             | 11340             | 1                                   | 11.3       | 0               | 213      | 0               | 1.436              | 32                         | 17                       |
| 66                       | 89         | 37.3             | 19               | 229                             | 12270             | 1                                   | 11.7       | 0               | 119      | 1               |                    |                            |                          |
| 84                       | 135        | 39.6             | 20               | 190                             | 10670             | 0                                   | 10.1       | 1               | 103      | 1               |                    |                            |                          |
| 88                       | 101        | 36.6             | 18               | 133                             | 26590             | 1                                   | 11.5       | 0               | 255      | 0               |                    |                            | 15                       |
| 75                       | 83         | 36.4             | 20               | n                               | 10530             | 0                                   | 7.8        | 1               |          |                 | 20.898             |                            |                          |
| 59                       | 95         | 36.9             | 20               | 80                              | 10960             | 0                                   | 11         | 0               | 171      | 0               | 21.219             |                            | 23                       |
| 61                       | 81         | 37.7             | 18               | 169                             | 6580              | 0                                   | 11         | 0               | 161      | 0               |                    | 97                         | 102                      |
| 55                       | 88         | 36.8             | 18               | 226                             | 5540              | 0                                   | 12.6       | 0               | 53       | 1               | 3.083              | 21                         | 31                       |
| 87                       | 83         | 39.2             | 20               | 275                             | 16420             | 1                                   | 11.9       | 0               | 206      | 0               | 19.009             | 16                         | 25                       |
| 97                       | 110        | 38.7             | 22               | 113                             | 9130              | 0                                   | 10.8       | 1               | 273      | 0               | 7.512              |                            | 17                       |
| 77                       | 82         | 38.4             | 22               | 148                             | 5820              | 0                                   | 10.9       | 1               | 175      | 0               | 2.432              |                            |                          |
| 75                       | 126        | 37.4             | 35               | 289                             | 11210             | 1                                   | 7.4        | 1               | 459      | 0               | 3.027              |                            |                          |
| 52                       | 72         | 36               | 11               | 173                             | 7880              | 0                                   | 9.2        | 1               | 422      | 0               |                    | 16                         |                          |
| 76                       | 71         | 37.1             | 20               | 127                             | 20230             | 1                                   | 10.1       | 1               | 275      | 0               |                    | 20                         | 13                       |
| 61                       | 121        | 36.4             | 26               | 154                             | 15650             | 1                                   | 8.7        | 1               | 226      | 0               | 27.368             | 39                         | 21                       |
| 44                       | 102        | 37               | 22               | 186                             | 3890              | 1                                   | 11.4       | 0               | 193      | 0               | 10.123             | 18                         | 11                       |
| 74                       | 90         | 36.4             | 20               | 122                             | 11480             | 1                                   | 13.7       | 0               | 338      | 0               |                    | 209                        | 75                       |
| 79                       | 66         | 36.5             | 20               | 385                             | 3240              | 1                                   | 13.6       | 0               | 203      | 0               |                    | 8                          | 12                       |
| 81                       | 98         | 36.3             | 17               | 101                             | 3260              | 1                                   | 10.5       | 1               | 289      | 0               |                    | 17                         | 10                       |
| 72                       | 95         | 35.2             | 31               | n                               | 3520              | 1                                   | 11.9       | 0               | 78       | 1               |                    |                            |                          |
| 81                       | 78         | 38               | 18               | n                               | 16500             | 1                                   | 8.1        | 1               | 396      | 0               | 3.376              | 20                         | 56                       |
| 76                       | 67         | 37.5             | 20               | 112                             | 10680             | 0                                   | 10.3       | 1               | 101      | 1               | 2.516              |                            | 8                        |
| 91                       | 129        | 39.1             | 22               | 185                             | 4130              | 0                                   | 9.3        | 1               | 54       | 1               |                    |                            | 79                       |
| 69                       | 103        | 37.4             | 22               | 102                             | 7980              | 0                                   | 13.4       | 0               | 175      | 0               | 1.485              |                            | 168                      |
| 73                       | 103        | 37.4             | 19               | 108                             | 3760              | 1                                   | 8.6        | 1               | 69       | 1               |                    | 310                        | 140                      |
| 95                       | 118        | 37.5             | 20               | 92                              | 14240             | 1                                   | 14.2       | 0               | 143      | 1               | 28.048             | 13                         | 13                       |
| 91                       | 138        | 38.4             | 26               | 119                             | 9100              | 0                                   | 14.4       | 0               | 170      | 0               |                    | 52                         | 24                       |
| 50                       | 102        | 37.5             | 27               | 126                             | 12780             | 1                                   | 2.9        | 1               | 182      | 0               | 11.806             | 21                         | 25                       |
| 80                       | 120        | 36               | 28               | 154                             | 31250             | 1                                   | 10.9       | 1               | 446      | 0               | 5.346              |                            | 30                       |
| 70                       | 91         | 38.4             | 32               | n                               | 11480             | 1                                   | 11.1       | 0               | 351      | 0               | 1.556              | 42                         | 43                       |
| 65                       | 85         | 37               | 17               | 96                              | 9590              | 0                                   | 9.3        | 1               | 160      | 0               | 7.535              |                            |                          |
| 89                       | 116        | 36.8             | 20               | 107                             | 18360             | 1                                   | 12.1       | 0               | 325      | 0               | 15.621             | 26                         | 33                       |
| 66                       | 100        | 37               | 20               | n                               | 13730             | 1                                   | 8          | 1               | 131      | 1               | 10.082             |                            |                          |
| 70                       | 80         | 37.7             | 20               | n                               | 2040              | 1                                   | 13.5       | 0               | 158      | 0               | 11.855             | 29                         | 27                       |
| 58                       | 82         | 37               | 16               | 213                             | 18010             | 1                                   | 8.6        | 1               | 359      | 0               |                    | 19                         | 35                       |
| 60                       | 90         | 36.3             | 22               | 245                             | 15130             | 1                                   | 11         | 0               | 91       | 1               | 18.658             | 206                        | 1271                     |
| 50                       | 68         | 36.8             | 20               | n                               | 8330              | 0                                   | 12.1       | 0               | 108      | 1               |                    | 28                         | 18                       |
| 78                       | 70         | 38.5             | 22               | 95                              | 8940              | 0                                   | 11.1       | 0               | 137      | 1               |                    | 27                         | 10                       |

|     |     |      |    |     |       |   |      |   |     |   |        |     |     |
|-----|-----|------|----|-----|-------|---|------|---|-----|---|--------|-----|-----|
| 74  | 66  | 39.1 | 22 | 101 | 8630  | 0 | 11.2 | 0 | 180 | 0 | 5.118  |     |     |
| 52  | 118 | 37.6 | 22 | 139 | 5530  | 0 | 10.6 | 1 | 71  | 1 | 17.029 | 147 | 42  |
| 80  | 113 | 36.1 | 30 | 141 | 10720 | 0 | 12.9 | 0 | 214 | 0 | 7.811  |     | 20  |
| 85  | 98  | 38.8 | 16 | 111 | 12980 | 1 | 13.3 | 0 | 80  | 1 | 18.614 | 117 | 140 |
| 89  | 80  | 39   | 32 | 160 | 15680 | 1 | 8.9  | 1 | 148 | 1 | 10.951 | 48  |     |
| 63  | 102 | 38.4 | 22 | 147 | 13920 | 1 | 8    | 1 | 236 | 0 |        |     | 37  |
| 83  | 96  | 39.4 | 22 | 161 | 11220 | 1 | 15.5 | 0 | 119 | 1 | 3.749  | 142 | 240 |
| 80  | 98  | 37.6 | 20 | 71  | 10680 | 0 | 8.5  | 1 | 155 | 0 | 18.495 | 14  | 6   |
| 72  | 113 | 38.1 | 19 | 136 | 7920  | 0 | 8.2  | 1 | 48  | 1 | 17.837 | 240 | 398 |
| 90  | 70  | 37.4 | 12 | 187 | 7420  | 0 | 9.1  | 1 | 185 | 0 | 0.667  | 24  | 28  |
| 54  | 109 | 37.5 | 14 | 176 | 8520  | 0 | 10.8 | 1 | 259 | 0 |        | 19  | 11  |
| 98  | 120 | 38.6 | 23 | 135 | 3270  | 1 | 9.8  | 1 | 214 | 0 |        |     | 7   |
| 48  | 108 | 37.2 | 29 | 119 | 21370 | 1 | 11.9 | 0 | 377 | 0 | 6.16   | 24  | 16  |
| 57  | 48  | 35.5 | 18 | 290 | 12420 | 1 | 13.9 | 0 | 178 | 0 |        |     |     |
| 62  | 80  | 37.6 | 19 | n   | 1980  | 1 | 8    | 1 | 137 | 1 |        |     |     |
| 115 | 116 | 37   | 20 | 478 | 19160 | 1 | 13.8 | 0 | 328 | 0 |        | 47  | 19  |
| 82  | 106 | 36.6 | 20 | 219 | 8270  | 0 | 10.9 | 1 | 214 | 0 | 1.554  | 37  | 27  |
| 53  | 65  | 38   | 20 | 142 | 19300 | 1 | 13.7 | 0 | 106 | 1 | 10.749 | 30  | 17  |
| 123 | 105 | 35.2 | 20 | 173 | 7220  | 0 | 12.3 | 0 | 216 | 0 |        | 16  | 8   |
| 77  | 91  | 37   | 18 | n   | 13350 | 1 | 9.2  | 1 | 77  | 1 |        | 84  | 21  |
| 98  | 82  | 37   | 20 | 119 | 4150  | 0 | 13.6 | 0 | 249 | 0 |        | 214 | 281 |
| 56  | 115 | 37.5 | 26 | 253 | 3160  | 1 | 10.4 | 1 | 249 | 0 | 22.995 | 43  | 7   |
| 73  | 96  | 37.6 | 24 | 118 | 7990  | 0 | 11.4 | 0 | 172 | 0 | 6.055  |     | 16  |
| 51  | 96  | 36.1 | 22 | 116 | 7690  | 0 | 9.5  | 1 | 209 | 0 |        | 37  |     |
| 72  | 80  | 38.8 | 20 | 110 | 8420  | 0 | 11.2 | 0 | 371 | 0 | 3.834  |     | 54  |
| 82  | 67  | 37.6 | 22 | 135 | 5570  | 0 | 12.4 | 0 | 482 | 0 | 1.051  |     | 40  |
| 60  | 114 | 36.8 | 18 | 82  | 1360  | 1 | 6.7  | 1 | 271 | 0 |        | 41  | 24  |
| 82  | 82  | 37   | 20 | 186 | 7160  | 0 | 7.8  | 1 | 170 | 0 |        | 21  | 10  |
| 44  | 107 | 37.3 | 13 | 224 | 12320 | 1 | 10.3 | 1 | 121 | 1 | 27.538 | 31  | 10  |
| 68  | 95  | 38.3 | 24 | n   | 3800  | 1 | 13.5 | 0 | 205 | 0 |        |     |     |
| 61  | 65  | 37   | 18 | 97  | 4780  | 0 | 9.5  | 1 | 294 | 0 |        | 16  | 8   |
| 64  | 98  | 35.3 | 27 | 186 | 3420  | 1 | 9.3  | 1 | 113 | 1 | 19.938 | 37  | 25  |
| 71  | 69  | 36.2 | 21 | 210 | 6710  | 0 | 10.5 | 1 | 303 | 0 |        |     |     |
| 55  | 67  | 36.8 | 13 | 131 | 7980  | 0 | 10.9 | 1 | 247 | 0 |        | 20  | 15  |
| 68  | 82  | 37.7 | 20 | 149 | 8670  | 0 | 10.3 | 1 | 154 | 0 |        | 19  | 18  |
| 80  | 133 | 39.5 | 30 | 127 | 6040  | 0 | 7.2  | 1 | 171 | 0 |        | 63  | 17  |
| 69  | 102 | 37.2 | 18 | 106 | 9640  | 0 | 10.8 | 1 | 98  | 1 |        | 56  | 30  |
| 128 | 100 | 38.4 | 24 | n   | 10120 | 0 | 8.6  | 1 | 222 | 0 | 12.042 | 32  | 17  |
| 87  | 86  | 37.1 | 20 | 138 | 9360  | 0 | 12.7 | 0 | 175 | 0 | 3.728  |     | 16  |
| 61  | 66  | 37   | 18 | n   | 4170  | 0 | 9.7  | 1 | 113 | 1 | 4.499  | 197 | 92  |
| 101 | 107 | 37   | 18 | 190 | 14900 | 1 | 11.1 | 0 | 330 | 0 | 4.61   | 22  | 25  |
| 68  | 116 | 37   | 22 | 201 | 11140 | 1 | 7.9  | 1 | 139 | 1 | 14.51  | 25  | 22  |

|     |     |      |    |     |       |   |      |   |     |   |        |     |     |
|-----|-----|------|----|-----|-------|---|------|---|-----|---|--------|-----|-----|
| 67  | 106 | 36   | 14 | 291 | 23640 | 1 | 8.5  | 1 | 102 | 1 | 0.651  |     |     |
| 73  | 104 | 38.7 | 26 | 251 | 10780 | 0 | 8.1  | 1 | 50  | 1 | 15.861 | 28  | 23  |
| 112 | 113 | 36.6 | 22 | 188 | 10000 | 0 | 7.7  | 1 | 197 | 0 |        |     |     |
| 49  | 81  | 38.2 | 20 | n   | 16610 | 1 | 11.5 | 0 | 368 | 0 | 14.233 | 62  | 21  |
| 75  | 98  | 36.9 | 26 | 139 | 15380 | 1 | 10.2 | 1 | 38  | 1 | 2.012  | 141 | 156 |
| 57  | 128 | 37.2 | 28 | 381 | 13250 | 1 | 10.3 | 1 | 84  | 1 |        |     |     |
| 91  | 76  | 39.6 | 20 | n   | 12070 | 1 | 10.5 | 1 | 183 | 0 | 2.208  | 51  | 49  |
| 93  | 75  | 37.4 | 20 | 119 | 12330 | 1 | 8.4  | 1 | 342 | 0 | 12.958 |     |     |
| 91  | 105 | 38.5 | 28 | 106 | 3020  | 1 | 11.4 | 0 | 106 | 1 |        | 51  | 30  |
| 71  | 60  | 36.7 | 23 | 125 | 17460 | 1 | 9.3  | 1 | 35  | 1 |        |     |     |
| 65  | 93  | 35   | 20 | 117 | 9730  | 0 | 8.6  | 1 | 66  | 1 | 5.481  |     | 37  |
| 56  | 100 | 38.3 | 18 | n   | 15760 | 1 | 9.2  | 1 | 365 | 0 | 36.689 | 67  | 16  |
| 69  | 77  | 36.6 | 20 | n   | 5990  | 0 | 11.5 | 0 | 299 | 0 | 2.162  | 132 | 115 |
| 57  | 96  | 37.3 | 22 | 147 | 12490 | 1 | 13.1 | 0 | 291 | 0 | 0.28   | 31  | 26  |
| 106 | 91  | 37.2 | 20 | n   | 9750  | 0 | 9.1  | 1 | 201 | 0 |        |     |     |
| 76  | 100 | 37   | 22 | 210 | 3390  | 1 | 11.8 | 0 | 159 | 0 | 5.813  | 86  | 46  |
| 75  | 80  | 37.4 | 24 | n   | 11790 | 1 | 11.2 | 0 | 197 | 0 |        | 52  | 41  |
| 40  | 101 | 36.6 | 22 | 444 | 9280  | 0 | 7.2  | 1 | 62  | 1 |        |     | 10  |
| 46  | 103 | 36.3 | 24 | n   | 4510  | 0 | 7.2  | 1 | 90  | 1 | 3.714  |     | 22  |
| 78  | 100 | 39   | 22 | 137 | 21500 | 1 | 9.5  | 1 | 168 | 0 | 13.884 | 26  | 20  |
| 82  | 110 | 38   | 20 | 94  | 10510 | 0 | 10.9 | 1 | 154 | 0 |        | 19  | 8   |
| 67  | 74  | 36.4 | 22 | 126 | 42070 | 1 | 14.4 | 0 | 122 | 1 | 0.701  | 24  | 25  |
| 66  | 131 | 38.2 | 24 | 117 | 9380  | 0 | 12.3 | 0 | 250 | 0 | 0.052  | 30  | 25  |
| 72  | 94  | 36.1 | 22 | 352 | 23180 | 1 | 11.8 | 0 | 241 | 0 | 13.804 | 14  | 20  |
| 107 | 81  | 36.6 | 28 | 125 | 8090  | 0 | 10.6 | 1 | 228 | 0 | 6.559  |     | 698 |
| 61  | 101 | 37.5 | 26 | 110 | 11070 | 1 | 10.2 | 1 | 202 | 0 | 8.531  | 23  | 17  |
| 77  | 91  | 39   | 18 | 284 | 12700 | 1 | 11   | 0 | 95  | 1 | 1.755  | 37  | 43  |
| 94  | 111 | 37.6 | 24 | 134 | 12610 | 1 | 9.9  | 1 | 406 | 0 | 2.775  | 23  | 12  |
| 67  | 85  | 38.8 | 19 | 143 | 10640 | 0 | 13.7 | 0 | 166 | 0 | 21.128 | 22  | 22  |
| 90  | 124 | 38.6 | 36 | 149 | 10850 | 0 | 11   | 0 | 76  | 1 | 19.351 |     |     |
| 54  | 80  | 36.9 | 23 | 203 | 15350 | 1 | 12.2 | 0 | 173 | 0 | 16.639 | 34  | 22  |
| 98  | 125 | 40.3 | 20 | 162 | 13360 | 1 | 12.2 | 0 | 368 | 0 | 3.438  | 26  | 21  |
| 58  | 74  | 35.9 | 20 | 124 | 12720 | 1 | 10.2 | 1 | 384 | 0 |        | 29  | 11  |
| 69  | 67  | 37   | 20 | 161 | 8150  | 0 | 11.8 | 0 | 221 | 0 | 6.415  |     | 13  |
| 66  | 78  | 37.1 | 20 | 133 | 15100 | 1 | 12.4 | 0 | 84  | 1 | 4.01   | 20  | 26  |
| 68  | 114 | 38.1 | 23 | 342 | 8650  | 0 | 8.2  | 1 | 147 | 1 |        |     |     |
| 54  | 96  | 38.1 | 18 | 270 | 10890 | 0 | 10.5 | 1 | 231 | 0 | 23.004 | 21  | 19  |
| 52  | 81  | 35.9 | 20 | 48  | 6110  | 0 | 9.5  | 1 | 359 | 0 | 0.173  | 26  | 67  |
| 62  | 75  | 38.3 | 16 | 102 | 24210 | 1 | 11.3 | 0 | 219 | 0 | 20.405 |     | 29  |
| 58  | 85  | 37.3 | 23 | 80  | 6820  | 0 | 10.1 | 1 | 138 | 1 |        |     |     |
| 70  | 100 | 37.5 | 19 | 93  | 3240  | 1 | 11.2 | 0 | 204 | 0 | 1.284  | 22  | 31  |
| 65  | 114 | 37.1 | 15 | n   | 17270 | 1 | 8.3  | 1 | 180 | 0 | 10.527 |     |     |

|     |     |      |    |     |       |   |      |   |     |   |        |     |     |
|-----|-----|------|----|-----|-------|---|------|---|-----|---|--------|-----|-----|
| 100 | 90  | 37.3 | 19 | 144 | 6670  | 0 | 8.6  | 1 | 65  | 1 |        | 15  | 5   |
| 81  | 86  | 37.3 | 20 | N   | 3810  | 1 | 12.7 | 0 | 91  | 1 | 7.179  | 106 | 150 |
| 115 | 80  | 37.2 | 18 | n   | 15900 | 1 | 9.5  | 1 | 100 | 1 | 2.162  | 37  | 31  |
| 70  | 130 | 37.9 | 26 | 206 | 8960  | 0 | 9.9  | 1 | 148 | 1 | 2.048  | 26  | 14  |
| 84  | 107 | 37.7 | 26 | 170 | 14280 | 1 | 13.4 | 0 | 317 | 0 | 5.343  | 13  | 8   |
| 95  | 83  | 36.5 | 20 | 116 | 9020  | 0 | 12.6 | 0 | 176 | 0 |        | 18  | 26  |
| 74  | 112 | 35.2 | 26 | 270 | 7590  | 0 | 14.5 | 0 | 235 | 0 | 1.674  | 20  | 13  |
| 102 | 100 | 38.4 | 20 | 140 | 11750 | 1 | 7.4  | 1 | 276 | 0 |        | 13  | 5   |
| 80  | 86  | 37.2 | 21 | 111 | 8170  | 0 | 11.9 | 0 | 40  | 1 |        | 147 | 175 |
| 70  | 110 | 36.4 | 18 | 323 | 7240  | 0 | 10.3 | 1 | 249 | 0 |        |     |     |
| 65  | 107 | 38.3 | 24 | N   | 9240  | 0 | 6.7  | 1 | 20  | 1 | 0.166  | 21  | 34  |
| 82  | 102 | 38.1 | 20 | 142 | 12810 | 1 | 15.3 | 0 | 108 | 1 | 33.784 | 35  | 29  |
| 56  | 74  | 36.4 | 22 | 117 | 4080  | 0 | 8    | 1 | 126 | 1 | 6.242  | 45  | 52  |
| 83  | 90  | 38.3 | 24 | 210 | 12610 | 1 | 12.5 | 0 | 430 | 0 |        | 19  | 19  |
| 86  | 82  | 36.5 | 20 | 191 | 11730 | 1 | 9.7  | 1 | 186 | 0 |        | 12  | 7   |
| 62  | 111 | 37.7 | 26 | 256 | 17830 | 1 | 7.5  | 1 | 287 | 0 | 8.49   | 24  | 21  |
| 77  | 111 | 38.5 | 29 | 207 | 14900 | 1 | 11.1 | 0 | 132 | 1 |        | 41  | 22  |
| 66  | 98  | 36.6 | 24 | 222 | 5340  | 0 | 10.2 | 1 | 376 | 0 | 10.334 |     |     |
| 122 | 158 | 41.6 | 20 | 194 | 21010 | 1 | 15.3 | 0 | 203 | 0 | 5.318  | 31  | 30  |
| 52  | 92  | 37.2 | 18 | 136 | 7420  | 0 | 8.5  | 1 | 52  | 1 |        | 45  | 6   |
| 88  | 90  | 36.9 | 20 | 528 | 7560  | 0 | 14.2 | 0 | 130 | 1 | 27.623 |     | 27  |
| 70  | 74  | 38   | 20 | 258 | 14800 | 1 | 12.3 | 0 | 112 | 1 | 23.596 | 24  | 28  |
| 62  | 72  | 36.1 | 22 | 108 | 5940  | 0 | 10   | 1 | 202 | 0 | 4.985  |     |     |
| 63  | 63  | 36.4 | 18 | 148 | 9830  | 0 | 9.3  | 1 | 345 | 0 | 5.1    | 22  | 28  |
| 61  | 102 | 37   | 22 | 277 | 21250 | 1 | 8.1  | 1 | 402 | 0 | 25.21  |     | 45  |
| 72  | 92  | 39.1 | 22 | 88  | 5920  | 0 | 9    | 1 | 313 | 0 | 4.227  | 35  | 23  |
| 43  | 144 | 37.2 | 23 | n   | 6060  | 0 | 7.1  | 1 | 55  | 1 |        |     |     |
| 53  | 120 | 37.3 | 29 | 98  | 8930  | 0 | 10.5 | 1 | 120 | 1 | 0.838  | 29  | 14  |
| 54  | 131 | 38.1 | 30 | 371 | 9280  | 0 | 10.8 | 1 | 235 | 0 |        | 36  | 12  |
| 67  | 84  | 38.6 | 24 | 103 | 14040 | 1 | 9.6  | 1 | 236 | 0 | 10.058 | 38  | 24  |
| 75  | 88  | 37.6 | 25 | 110 | 9880  | 0 | 12   | 0 | 211 | 0 | 1.188  |     |     |
| 54  | 76  | 36   | 26 | 148 | 7310  | 0 | 9.8  | 1 | 205 | 0 | 11.885 | 11  | 13  |
| 78  | 131 | 41.1 | 28 | n   | 9600  | 0 | 11.6 | 0 | 224 | 0 | 18.174 | 19  | 6   |
| 85  | 65  | 36   | 20 | n   | 8190  | 0 | 10.3 | 1 | 207 | 0 | 1.486  | 16  | 6   |
| 66  | 87  | 36.8 | 20 | 208 | 6330  | 0 | 14.9 | 0 | 178 | 0 |        |     | 207 |
| 59  | 77  | 36   | 16 | 158 | 12770 | 1 | 7.5  | 1 | 62  | 1 |        | 26  | 29  |
| 54  | 94  | 37.7 | 94 | n   | 8880  | 0 | 10.3 | 1 | 192 | 0 |        | 19  | 13  |
| 118 | 117 | 38.8 | 22 | 310 | 10040 | 0 | 30.6 | 0 | 390 | 0 | 4.516  | 27  | 18  |
| 94  | 104 | 36.8 | 20 | 783 | 18340 | 1 | 11.4 | 0 | 249 | 0 |        | 251 | 112 |
| 48  | 103 | 36   | 26 | 107 | 10190 | 0 | 9.7  | 1 | 227 | 0 |        |     | 48  |
| 73  | 100 | 38.5 | 20 | 438 | 16220 | 1 | 13.1 | 0 | 167 | 0 | 0.129  | 32  | 59  |
| 80  | 105 | 36.8 | 20 | 102 | 14450 | 1 | 12.3 | 0 | 382 | 0 |        |     | 10  |

| Blood urea nitrogen | Creatinine | Creatinine > 1.4 | Sodium | Potassium | Baseline Creatinine | Intensive care unit admission | Recommended dose | Duration of hospitalization | In-hospital mortality | time-to-onset of seizures (hours) | Computed tomography scan of brain | Electroencephalography |
|---------------------|------------|------------------|--------|-----------|---------------------|-------------------------------|------------------|-----------------------------|-----------------------|-----------------------------------|-----------------------------------|------------------------|
| 42.5                | 1.6        | 1                | 139    | 6.24      | 0.69                | 1                             | 1                | 4                           | 1                     | 19.5                              | 1                                 | 1                      |
| 13.9                | 1.04       | 0                | 141    | 3.76      | 0.63                | 1                             | 1                | 14                          | 0                     |                                   |                                   |                        |
|                     |            |                  | 137    | 3.43      | X                   | 0                             | 0                | 56                          | 0                     |                                   |                                   |                        |
| 22.7                | 1.08       | 0                | 137    | 4.14      | 0.75                | 0                             | 1                | 23                          | 0                     |                                   |                                   |                        |
|                     |            |                  | 138    | 4.24      | X                   | 0                             | 0                | 7                           | 0                     |                                   |                                   |                        |
|                     |            |                  | 131    | 3.03      | 7.48                | 1                             | 0                | 41                          | 0                     | 38                                | 1                                 | 1                      |
| 23.4                | 0.81       | 0                | 136    | 4.28      | 0.5                 | 1                             | 1                | 19                          | 0                     |                                   |                                   |                        |
| 26                  | 6.55       | 1                | 140    | 3.63      | X                   | 0                             | 0                | 12                          | 0                     |                                   |                                   |                        |
| 22                  | 0.78       | 0                | 137    | 3.57      | 0.65                | 0                             | 1                | 33                          | 0                     |                                   |                                   |                        |
| 14.6                | 1.2        | 0                | 131    | 4.2       | 1.03                | 0                             | 1                | 8                           | 0                     |                                   |                                   |                        |
| 22.9                | 1.3        | 0                | 134    | 3.5       | 0.61                | 0                             | 1                | 10                          | 0                     | 45                                | 1                                 | 0                      |
| 10.5                | 1.07       | 0                | 147    | 2.69      | 0.7                 | 0                             | 1                | 19                          | 0                     |                                   |                                   |                        |
| 18.7                | 0.75       | 0                | 134    | 4.89      | 0.75                | 0                             | 1                | 41                          | 1                     |                                   |                                   |                        |
| 96.5                | 3.51       | 1                | 140    | 2.76      | 1.23                | 1                             | 0                | 19                          | 0                     |                                   |                                   |                        |
| 27.5                | 1.31       | 0                | 125    | 4.57      | 1.18                | 0                             | 1                | 7                           | 0                     |                                   |                                   |                        |
|                     |            |                  | 140    | 2.37      | X                   | 0                             | 0                | 5                           | 1                     | 13                                | 0                                 | 0                      |
| 98.7                | 4.85       | 1                | 136    | 3.74      | 0.98                | 1                             | 1                | 27                          | 0                     |                                   |                                   |                        |
| 11.8                | 0.83       | 0                | 136    | 3.1       | 0.69                | 0                             | 1                | 20                          | 0                     |                                   |                                   |                        |
| 38.4                | 1.46       | 1                | 131    | 3.7       | 0.82                | 0                             | 0                | 13                          | 0                     |                                   |                                   |                        |
| 111                 | 9.96       | 1                | 127    | 5.58      | 0.78                | 1                             | 0                | 27                          | 0                     |                                   |                                   |                        |
|                     | 1.22       | 0                | 149    | 4.43      | 1.04                | 1                             | 1                | 23                          | 1                     | 51                                | 0                                 | 1                      |
| 54.1                | 2.63       | 1                | 141    | 4.43      | 2.25                | 0                             | 0                | 20                          | 0                     |                                   |                                   |                        |
| 21                  | 1.58       | 1                | 135    | 4.01      | 1.54                | 0                             | 1                | 6                           | 0                     |                                   |                                   |                        |
| 16.1                | 0.86       | 0                | 129    | 2.85      | 0.83                | 0                             | 1                | 10                          | 0                     |                                   |                                   |                        |
| 22.9                | 0.98       | 0                | 139    | 3.97      | 0.7                 | 0                             | 1                | 7                           | 0                     |                                   |                                   |                        |
| 72.4                | 6.07       | 1                | 141    | 3.69      | 5.89                | 0                             | 0                | 19                          | 1                     | 189                               | 1                                 | 1                      |
| 38.1                | 1.86       | 1                | 136    | 4.09      | 1.66                | 0                             | 1                | 11                          | 0                     |                                   |                                   |                        |
| 18.4                | 1.3        | 0                | 140    | 3.94      | 0.9                 | 0                             | 1                | 8                           | 0                     |                                   |                                   |                        |
| 18.7                | 0.97       | 0                | 122    | 4.73      | 0.58                | 1                             | 1                | 14                          | 0                     |                                   |                                   |                        |
| 22.1                | 0.66       | 0                | 134    | 4.52      | 0.65                | 0                             | 1                | 54                          | 0                     |                                   |                                   |                        |
| 26.1                | 0.96       | 0                | 134    | 4.17      | 0.78                | 0                             | 1                | 41                          | 0                     | 56                                | 0                                 | 1                      |
| 15.7                | 0.67       | 0                | 142    | 3.11      | 0.67                | 1                             | 1                | 15                          | 0                     |                                   |                                   |                        |
| 32.9                | 1.14       | 0                | 137    | 3.98      | 0.68                | 0                             | 1                | 31                          | 0                     |                                   |                                   |                        |
|                     | 1.43       | 1                | 133    | 4.26      | 1.27                | 0                             | 1                | 27                          | 0                     |                                   |                                   |                        |
| 20                  | 1.13       | 0                | 131    | 4.29      | 0.95                | 0                             | 1                | 12                          | 0                     |                                   |                                   |                        |
| 49.3                | 1.25       | 0                | 127    | 4.57      | 0.99                | 1                             | 1                | 13                          | 0                     | 117.5                             | 1                                 | 1                      |
| 149.6               | 6.15       | 1                | 152    | 3         | 2.6                 | 1                             | 0                | 35                          | 0                     |                                   |                                   |                        |
| 22.4                | 1.09       | 0                | 128    | 3.01      | 1.04                | 0                             | 1                | 32                          | 0                     |                                   |                                   |                        |
| 19.6                | 0.79       | 0                | 102    | 5.6       | 0.76                | 1                             | 1                | 25                          | 0                     |                                   |                                   |                        |

|       |      |   |     |      |      |   |   |    |   |      |        |   |
|-------|------|---|-----|------|------|---|---|----|---|------|--------|---|
| 11.2  | 1.06 | 0 | 131 | 4.09 | 0.86 | 0 | 1 | 18 | 0 |      |        |   |
| 59.3  | 2.04 | 1 | 164 | 3.34 | 0.82 | 1 | 0 | 41 | 0 | 17   | 1      | 1 |
| 18.5  | 0.58 | 0 | 129 | 4.02 | 0.49 | 1 | 1 | 32 | 0 |      |        |   |
| 23.4  | 1.2  | 0 | 140 | 3.46 | 1.06 | 0 | 1 | 25 | 0 |      |        |   |
| 121.2 | 9.34 | 1 | 137 | 3.94 | 6.42 | 1 | 0 | 15 | 0 |      |        |   |
| 79.9  | 2.1  | 1 | 138 | 4.11 | 1.22 | 0 | 0 | 18 | 0 |      |        |   |
| 17.8  | 1.26 | 0 | 136 | 3.99 | 1.04 | 0 | 1 | 14 | 0 | 48   | 0      | 1 |
| 38.7  | 4.34 | 1 | 123 | 3.99 | 1.56 | 0 | 0 | 17 | 0 |      |        |   |
| 27.1  | 1.45 | 1 | 139 | 3.1  | 1.08 | 1 | 1 | 21 | 0 |      |        |   |
| 39.6  | 2.67 | 1 | 139 | 3.49 | 2.25 | 1 | 1 | 13 | 0 |      |        |   |
| 18    | 1.53 | 1 | 131 | 3.62 | 0.9  | 0 | 1 | 17 | 0 |      |        |   |
| 10.3  | 0.7  | 0 | 132 | 3.44 | 0.54 | 0 | 1 | 52 | 0 | 27   | 1      | 1 |
| 11.1  | 0.63 | 0 | 130 | 3.81 | 0.63 | 0 | 1 | 14 | 0 |      |        |   |
| 12.2  | 1.11 | 0 | 146 | 3.76 | 0.87 | 1 | 1 | 17 | 0 |      |        |   |
| 6.5   | 0.7  | 0 | 140 | 3.18 | 0.64 | 0 | 1 | 15 | 0 |      |        |   |
| 12.6  | 0.82 | 0 | 129 | 5.12 | 0.82 | 0 | 1 | 12 | 0 |      |        |   |
| 8.8   | 0.38 | 0 | 135 | 4.13 | 0.29 | 0 | 1 | 9  | 0 | 23   | 1, MRI | 1 |
| 21.1  | 1.27 | 0 | 139 | 3.66 | 0.89 | 0 | 1 | 7  | 0 |      |        |   |
| 28.7  | 5.95 | 1 |     |      | X    | 0 | 0 | 7  | 0 |      |        |   |
| 9.4   | 0.3  | 0 | 140 | 2.72 | 0.2  | 0 | 1 | 14 | 1 |      |        |   |
| 11.8  | 0.47 | 0 | 132 | 4.1  | 0.36 | 0 | 1 | 52 | 1 |      |        |   |
| 21.7  | 1.17 | 0 | 138 | 3.67 | 0.89 | 0 | 1 | 31 | 0 | 67.5 | 1      | 1 |
|       | 1.04 | 0 | 137 | 3.09 | 0.99 | 0 | 1 | 10 | 0 |      |        |   |
| 24.7  | 1.98 | 1 | 134 | 3.58 | 1.12 | 0 | 0 | 10 | 0 |      |        |   |
| 19.4  | 1.12 | 0 | 136 | 3.9  | 0.85 | 0 | 1 | 10 | 0 |      |        |   |
| 19.7  | 1.08 | 0 | 133 | 3.75 | 0.72 | 0 | 1 | 12 | 0 |      |        |   |
| 77.6  | 3.37 | 1 | 137 | 4.27 | 2.06 | 0 | 0 | 19 | 0 | 75   | 1      | 1 |
| 54.4  | 1.65 | 1 | 136 | 5.4  | 1.39 | 0 | 0 | 10 | 0 |      |        |   |
| 58.9  | 2.94 | 1 | 132 | 4.19 | 1.75 | 1 | 1 | 26 | 1 |      |        |   |
| 20    | 0.28 | 0 | 140 | 3.08 | 0.28 | 0 | 1 | 18 | 0 |      |        |   |
| 28.4  | 1.62 | 1 | 133 | 4.43 | 1.08 | 0 | 0 | 7  | 0 |      |        |   |
| 40.5  | 1.2  | 0 | 99  | 4.6  | 0.8  | 0 | 0 | 6  | 1 | 69   | 0      | 1 |
|       | 1.48 | 1 | 133 | 3.34 | 0.68 | 0 | 1 | 24 | 0 |      |        |   |
| 47.9  | 1.86 | 1 | 137 | 3.68 | 0.94 | 1 | 0 | 13 | 0 |      |        |   |
| 57.4  | 2.86 | 1 | 121 | 4.96 | 1.26 | 0 | 0 | 13 | 0 |      |        |   |
| 38.1  | 0.85 | 0 | 134 | 4.71 | 0.52 | 0 | 1 | 54 | 1 |      |        |   |
| 12.9  | 1.29 | 0 | 133 | 2.99 | 0.96 | 0 | 0 | 28 | 0 | 178  | 1      | 1 |
| 48.3  | 1.46 | 1 | 144 | 3.72 | 1.34 | 1 | 1 | 18 | 0 |      |        |   |
| 21.1  | 1.06 | 0 | 137 | 3.95 | 0.59 | 0 | 1 | 12 | 0 |      |        |   |
| 13.7  | 1.03 | 0 | 135 | 4.4  | 0.99 | 0 | 1 | 15 | 0 |      |        |   |
| 25.9  | 1.61 | 1 | 127 | 4.68 | 1.17 | 0 | 0 | 11 | 0 |      |        |   |
| 106   | 2.93 | 1 | 140 | 4.29 | 1.87 | 0 | 1 | 7  | 1 | 16   | 1      | 0 |

|       |      |   |     |      |      |   |   |    |   |      |   |   |
|-------|------|---|-----|------|------|---|---|----|---|------|---|---|
| 139.3 | 5.49 | 1 | 132 | 3.07 | 4.2  | 1 | 0 | 24 | 0 |      |   |   |
| 30.7  | 1.67 | 1 | 137 | 4.22 | 1    | 0 | 1 | 6  | 0 |      |   |   |
|       |      |   |     |      | X    | 1 | 0 | 35 | 0 |      |   |   |
| 14.5  | 1.08 | 0 | 143 | 4.38 | 0.81 | 0 | 1 | 16 | 0 |      |   |   |
| 146.7 | 4.73 | 1 | 135 | 4.36 | 4.43 | 1 | 0 | 5  | 1 | 55.5 | 0 | 0 |
| 13.9  | 0.87 | 0 | 134 | 4.17 | 0.83 | 0 | 1 | 59 | 1 |      |   |   |
| 12.8  | 1.24 | 0 | 135 | 4.34 | 1.05 | 0 | 1 | 11 | 0 |      |   |   |
| 12.1  | 1.52 | 1 | 137 | 3.35 | 1.1  | 0 | 1 | 25 | 0 |      |   |   |
| 9.3   | 1.35 | 0 | 139 | 3.43 | 1.05 | 1 | 1 | 12 | 0 |      |   |   |
| 18.3  | 1.03 | 0 | 131 | 2.92 | 0.51 | 1 | 1 | 15 | 1 | 65   | 0 | 0 |
| 54.8  | 5.2  | 1 | 132 | 2.79 | 3.09 | 0 | 1 | 28 | 1 |      |   |   |
|       |      |   |     |      | X    | 0 | 0 | 17 | 0 |      |   |   |
| 19.9  | 1.03 | 0 | 136 | 3.18 | 0.84 | 0 | 1 | 25 | 0 |      |   |   |
| 39    | 1.5  | 1 | 138 | 3.73 | 0.93 | 0 | 0 | 20 | 0 |      |   |   |
| 53.8  | 2    | 1 | 130 | 4.08 | 1.47 | 0 | 0 | 20 | 0 | 67.5 | 0 | 0 |
| 35.7  | 1.2  | 0 | 129 | 3.74 | 0.78 | 0 | 0 | 17 | 0 |      |   |   |
| 13.1  | 0.54 | 0 | 141 | 2.94 | 0.52 | 1 | 1 | 17 | 0 |      |   |   |
| 89.6  | 1.85 | 1 | 151 | 3.89 | 0.79 | 1 | 0 | 24 | 0 |      |   |   |
| 11.2  | 1    | 0 | 138 | 4    | 0.95 | 0 | 1 | 15 | 0 |      |   |   |
| 18    | 1    | 0 | 133 | 2.73 | 0.7  | 0 | 1 | 53 | 0 | 114  | 1 | 1 |
| 25.7  | 1.75 | 1 | 139 | 3.98 | 1.28 | 0 | 0 | 13 | 0 |      |   |   |
| 21.9  | 1.23 | 0 | 140 | 4.51 | 1.14 | 0 | 1 | 8  | 0 |      |   |   |
| 16.3  | 1.36 | 0 | 140 | 3.78 | 1.23 | 0 | 1 | 5  | 1 |      |   |   |
| 24.8  | 1.69 | 1 | 132 | 4.04 | 1.39 | 0 | 1 | 17 | 0 |      |   |   |
| 10.5  | 0.76 | 0 | 107 | 3.87 | 0.7  | 1 | 1 | 15 | 0 | 261  | 0 | 0 |
| 27.8  | 1.12 | 0 | 137 | 3.67 | 0.88 | 0 | 1 | 11 | 0 |      |   |   |
| 26.3  | 1.19 | 0 | 131 | 3.72 | 1.12 | 0 | 1 | 8  | 0 |      |   |   |
| 73.5  | 6.13 | 1 | 137 | 3.13 | 6.09 | 1 | 1 | 24 | 0 |      |   |   |
|       |      |   | 142 | 4.35 | X    | 0 | 0 | 11 | 1 |      |   |   |
| 25.4  | 1.72 | 1 | 148 | 2.9  | 0.75 | 0 | 0 | 30 | 1 | 249  | 1 | 1 |
| 32.8  | 1.72 | 1 | 158 | 2.75 | 1    | 1 | 0 | 21 | 0 |      |   |   |
| 16.8  | 1.09 | 0 | 135 | 3.91 | 0.96 | 0 | 1 | 10 | 0 |      |   |   |
| 13.7  | 1.24 | 0 | 128 | 3.01 | 0.9  | 1 | 1 | 13 | 0 |      |   |   |
| 9.8   | 0.54 | 0 | 137 | 3.58 | 0.33 | 0 | 1 | 9  | 0 |      |   |   |
| 14.7  | 0.86 | 0 | 139 | 3.58 | 0.59 | 0 | 1 | 70 | 0 | 71.5 | 1 | 1 |
| 20.4  | 0.74 | 0 | 154 | 3.56 | 0.56 | 1 | 1 | 29 | 1 |      |   |   |
| 77.1  | 2.22 | 1 | 134 | 3.38 | 1.84 | 1 | 1 | 12 | 0 |      |   |   |
| 23.8  | 0.8  | 0 | 139 | 3.97 | 0.8  | 0 | 1 | 11 | 0 |      |   |   |
| 17.5  | 1.35 | 0 | 130 | 4.42 | 1.17 | 0 | 1 | 67 | 0 |      |   |   |
| 11.1  | 0.71 | 0 | 135 | 3.62 | 0.64 | 1 | 1 | 64 | 0 | 90   | 1 | 1 |
| 11.6  | 0.62 | 0 | 135 | 4.27 | 0.46 | 0 | 1 | 10 | 0 |      |   |   |
| 14    | 0.61 | 0 | 142 | 3.06 | 0.54 | 1 | 1 | 45 | 1 |      |   |   |

|       |       |   |     |      |       |   |   |    |   |       |   |   |
|-------|-------|---|-----|------|-------|---|---|----|---|-------|---|---|
| 63.3  | 5.14  | 1 | 135 | 4.13 | 5.14  | 0 | 1 | 17 | 0 |       |   |   |
| 24.2  | 1.15  | 0 | 138 | 4.06 | 0.93  | 0 | 1 | 20 | 0 |       |   |   |
| 41.2  | 2.31  | 1 | 143 | 3.11 | 2.09  | 0 | 0 | 26 | 1 | 9     | 0 | 0 |
| 30.4  | 2.05  | 1 | 139 | 4.17 | 1.61  | 0 | 1 | 10 | 0 |       |   |   |
| 37.4  | 2.98  | 1 | 145 | 3.28 | 1.61  | 0 | 0 | 9  | 0 |       |   |   |
| 18    | 1.04  | 0 | 137 | 3.27 | 0.79  | 0 | 1 | 7  | 0 |       |   |   |
| 19.8  | 0.73  | 0 | 128 | 2.76 | 0.58  | 1 | 1 | 10 | 0 |       |   |   |
| 94    | 11.33 | 1 | 137 | 4.18 | 10.53 | 0 | 0 | 14 | 0 | 35.5  | 1 | 1 |
| 32.2  | 1.25  | 0 | 138 | 3.98 | 0.78  | 0 | 1 | 9  | 0 |       |   |   |
| 15.2  | 0.26  | 0 | 124 | 4.67 | 0.26  | 0 | 1 | 38 | 0 |       |   |   |
| 51.3  | 0.72  | 0 | 153 | 3.21 | 0.46  | 0 | 1 | 18 | 1 |       |   |   |
| 55.8  | 3.69  | 1 | 133 | 3.34 | 1.18  | 0 | 0 | 11 | 0 |       |   |   |
| 39    | 0.55  | 0 | 118 | 3.33 | 0.47  | 0 | 1 | 14 | 1 | 137.5 | 0 | 1 |
| 15.7  | 1.01  | 0 | 137 | 3.11 | 0.76  | 0 | 1 | 29 | 0 |       |   |   |
| 50.5  | 5.12  | 1 | 132 | 4.58 | 5.02  | 0 | 1 | 10 | 0 |       |   |   |
| 37.3  | 2.92  | 1 | 129 | 3.1  | 1.91  | 0 | 0 | 23 | 0 |       |   |   |
| 35.8  | 3.29  | 1 | 139 | 3.22 | 1.17  | 1 | 1 | 28 | 0 |       |   |   |
| 27.8  | 0.81  | 0 | 153 | 2.4  | 0.49  | 0 | 1 | 25 | 0 | 44    | 0 | 0 |
| 11.8  | 0.95  | 0 | 138 | 3.74 | 0.81  | 0 | 1 | 8  | 0 |       |   |   |
| 116.9 | 4.8   | 1 | 130 | 4.84 | 3.51  | 1 | 0 | 13 | 0 |       |   |   |
| 23.4  | 0.62  | 0 | 129 | 4.73 | 0.42  | 1 | 1 | 34 | 0 |       |   |   |
| 60.9  | 2.93  | 1 | 137 | 4.15 | 1.58  | 0 | 1 | 19 | 0 |       |   |   |
| 8.2   | 0.4   | 0 | 138 | 3.49 | 0.36  | 0 | 1 | 14 | 0 | 102   | 0 | 1 |
| 21    | 1.01  | 0 | 135 | 3.95 | 0.86  | 0 | 1 | 35 | 0 |       |   |   |
| 33.1  | 1.13  | 0 | 133 | 3.72 | 0.94  | 0 | 1 | 15 | 0 |       |   |   |
| 17.6  | 0.37  | 0 | 129 | 4.24 | 0.36  | 0 | 1 | 10 | 0 |       |   |   |
| 71.2  | 0.87  | 0 | 153 | 4.1  | 0.85  | 1 | 1 | 41 | 1 |       |   |   |
| 56.5  | 0.97  | 0 | 154 | 3.27 | 0.66  | 1 | 1 | 32 | 0 | 104   | 0 | 1 |
| 40.9  | 1.67  | 1 | 138 | 2.84 | 0.86  | 1 | 1 | 53 | 1 |       |   |   |
| 68.8  | 2.31  | 1 | 134 | 4.54 | 1.73  | 0 | 0 | 11 | 0 |       |   |   |
| 24.5  | 0.62  | 0 | 133 | 4.47 | 0.56  | 0 | 0 | 33 | 0 |       |   |   |
| 9.4   | 1.04  | 0 | 128 | 3.31 | 0.74  | 0 | 1 | 13 | 0 |       |   |   |
| 11.8  | 1.36  | 0 | 143 | 4.22 | 0.63  | 0 | 1 | 25 | 0 | 121.5 | 1 | 1 |
| 40.5  | 5     | 1 | 139 | 2.79 | 2.09  | 0 | 0 | 11 | 0 |       |   |   |
| 9.7   | 0.82  | 0 | 137 | 3.76 | 0.77  | 0 | 1 | 6  | 0 |       |   |   |
| 191.7 | 9.39  | 1 | 153 | 3.92 | 3.26  | 1 | 1 | 36 | 0 |       |   |   |
| 20.7  | 1.02  | 0 | 135 | 3.58 | 0.82  | 0 | 1 | 12 | 0 |       |   |   |
| 23.7  | 1.17  | 0 | 131 | 4.21 | 0.9   | 0 | 0 | 15 | 0 | 29    | 0 | 1 |
| 95.2  | 1.68  | 1 | 142 | 3.77 | 1.49  | 1 | 1 | 9  | 0 |       |   |   |
| 22.7  | 0.79  | 0 | 143 | 3.47 | 0.66  | 1 | 1 | 17 | 0 |       |   |   |
| 58.3  | 1.42  | 1 | 161 | 4.16 | 0.6   | 0 | 1 | 11 | 0 |       |   |   |
| 33.5  | 1.54  | 1 | 131 | 2.74 | 1.29  | 0 | 1 | 15 | 0 |       |   |   |







|   |   |   |   |   |   |   |   |   |   |   |   |   |   |
|---|---|---|---|---|---|---|---|---|---|---|---|---|---|
|   |   | 0 | 0 | 0 | 0 | 0 | 0 | 0 | 0 | 0 | 0 | 0 | 0 |
|   |   | 1 | 0 | 0 | 0 | 0 | 0 | 0 | 0 | 0 | 0 | 0 | 0 |
|   |   | 1 | 1 | 1 | 1 | 0 | 0 | 0 | 0 | 1 | 0 | 1 |   |
|   |   | 0 | 0 | 0 | 0 | 0 | 0 | 0 | 0 | 0 | 0 | 0 |   |
| 1 | 1 | 1 | 0 | 0 | 0 | 0 | 0 | 0 | 0 | 0 | 0 | 1 | 0 |
|   |   | 1 | 0 | 0 | 0 | 0 | 0 | 0 | 0 | 0 | 0 | 0 | 0 |
|   |   | 1 | 0 | 0 | 0 | 0 | 0 | 0 | 0 | 0 | 0 | 1 | 0 |
|   |   | 1 | 0 | 0 | 0 | 0 | 0 | 0 | 0 | 0 | 1 | 0 | 0 |
|   |   | 1 | 0 | 0 | 0 | 0 | 0 | 0 | 0 | 0 | 0 | 0 | 0 |
| 1 | 1 | 1 | 1 | 0 | 0 | 0 | 0 | 0 | 0 | 0 | 0 | 0 | 0 |
|   |   | 1 | 0 | 0 | 1 | 0 | 0 | 0 | 0 | 0 | 0 | 0 | 1 |
|   |   | 0 | 0 | 0 | 0 | 0 | 0 | 0 | 0 | 0 | 0 | 0 | 0 |
|   |   | 1 | 1 | 0 | 0 | 0 | 0 | 0 | 0 | 1 | 0 | 0 | 1 |
|   |   | 1 | 0 | 0 | 0 | 1 | 1 | 0 | 0 | 0 | 0 | 0 | 0 |
| 1 | 1 | 1 | 1 | 0 | 1 | 0 | 0 | 0 | 0 | 0 | 0 | 0 | 0 |
|   |   | 1 | 1 | 1 | 0 | 0 | 0 | 0 | 0 | 0 | 0 | 0 | 1 |
|   |   | 0 | 0 | 0 | 0 | 0 | 0 | 0 | 0 | 0 | 0 | 0 | 0 |
|   |   | 0 | 0 | 0 | 0 | 0 | 0 | 0 | 0 | 0 | 0 | 0 | 0 |
|   |   | 1 | 0 | 0 | 0 | 0 | 0 | 0 | 0 | 0 | 0 | 1 | 0 |
| 0 | 1 | 1 | 1 | 0 | 0 | 0 | 0 | 0 | 0 | 0 | 0 | 1 | 1 |
|   |   | 1 | 0 | 0 | 0 | 0 | 0 | 0 | 0 | 0 | 0 | 1 | 1 |
|   |   | 1 | 1 | 1 | 1 | 0 | 0 | 0 | 0 | 0 | 0 | 0 | 0 |
|   |   | 1 | 1 | 0 | 0 | 0 | 0 | 0 | 0 | 0 | 0 | 0 | 0 |
|   |   | 1 | 1 | 1 | 0 | 0 | 1 | 0 | 0 | 0 | 0 | 0 | 0 |
| 0 | 1 | 1 | 0 | 0 | 0 | 0 | 0 | 0 | 0 | 0 | 0 | 1 | 1 |
|   |   | 0 | 0 | 0 | 0 | 0 | 0 | 0 | 0 | 0 | 0 | 0 | 0 |
|   |   | 1 | 0 | 0 | 0 | 0 | 0 | 0 | 0 | 0 | 0 | 0 | 0 |
|   |   | 1 | 1 | 1 | 0 | 1 | 0 | 0 | 0 | 0 | 0 | 0 | 1 |
|   |   | 1 | 0 | 0 | 0 | 0 | 0 | 0 | 0 | 0 | 0 | 0 | 1 |
| 1 | 1 | 1 | 0 | 0 | 0 | 0 | 0 | 0 | 0 | 0 | 0 | 0 | 1 |
|   |   | 1 | 0 | 0 | 1 | 0 | 0 | 0 | 0 | 0 | 0 | 0 | 0 |
|   |   | 1 | 0 | 0 | 0 | 0 | 0 | 0 | 0 | 0 | 0 | 0 | 1 |
|   |   | 1 | 0 | 0 | 0 | 0 | 0 | 0 | 0 | 0 | 0 | 1 | 0 |
|   |   | 1 | 1 | 0 | 0 | 0 | 0 | 1 | 0 | 0 | 0 | 0 | 1 |
| 0 | 1 | 1 | 1 | 0 | 0 | 0 | 0 | 0 | 1 | 1 | 0 | 0 | 0 |
|   |   | 1 | 1 | 0 | 0 | 0 | 0 | 0 | 0 | 0 | 0 | 0 | 0 |
|   |   | 0 | 0 | 0 | 0 | 0 | 0 | 0 | 0 | 0 | 0 | 0 | 0 |
|   |   | 1 | 0 | 0 | 1 | 0 | 0 | 0 | 0 | 0 | 0 | 0 | 0 |
|   |   | 1 | 1 | 0 | 0 | 1 | 0 | 1 | 0 | 0 | 0 | 0 | 0 |
| 1 | 1 | 1 | 0 | 0 | 0 | 0 | 0 | 0 | 1 | 0 | 0 | 0 | 0 |
|   |   | 1 | 0 | 0 | 0 | 0 | 0 | 0 | 1 | 0 | 0 | 0 | 1 |
|   |   | 1 | 0 | 0 | 0 | 0 | 0 | 0 | 1 | 0 | 0 | 1 | 0 |

|   |   |   |   |   |   |   |   |   |   |   |   |   |
|---|---|---|---|---|---|---|---|---|---|---|---|---|
|   |   | 1 | 1 | 1 | 1 | 0 | 0 | 0 | 0 | 0 | 0 | 0 |
|   |   | 0 | 0 | 0 | 0 | 0 | 0 | 0 | 0 | 0 | 0 | 0 |
| 1 | 1 | 1 | 1 | 0 | 1 | 0 | 0 | 0 | 0 | 0 | 1 | 1 |
|   |   | 1 | 1 | 0 | 1 | 0 | 0 | 1 | 0 | 0 | 0 | 1 |
|   |   | 1 | 0 | 0 | 0 | 0 | 0 | 0 | 0 | 0 | 0 | 0 |
|   |   | 1 | 0 | 0 | 0 | 0 | 0 | 1 | 0 | 0 | 0 | 0 |
|   |   | 1 | 0 | 0 | 1 | 0 | 0 | 0 | 0 | 0 | 0 | 0 |
| 1 | 1 | 1 | 0 | 0 | 0 | 0 | 0 | 0 | 0 | 0 | 0 | 0 |
|   |   | 0 | 0 | 0 | 0 | 0 | 0 | 0 | 0 | 0 | 0 | 0 |
|   |   | 0 | 0 | 0 | 0 | 0 | 0 | 0 | 0 | 0 | 0 | 0 |
|   |   | 1 | 0 | 0 | 0 | 0 | 0 | 1 | 0 | 0 | 0 | 0 |
|   |   | 1 | 0 | 0 | 0 | 0 | 0 | 1 | 0 | 0 | 1 | 1 |
| 1 | 1 | 1 | 1 | 0 | 0 | 0 | 0 | 0 | 0 | 0 | 0 | 0 |
|   |   | 1 | 0 | 1 | 1 | 0 | 0 | 0 | 1 | 1 | 0 | 0 |
|   |   | 1 | 1 | 0 | 0 | 0 | 0 | 0 | 0 | 1 | 0 | 0 |
|   |   | 0 | 0 | 0 | 0 | 0 | 0 | 0 | 0 | 0 | 0 | 0 |
|   |   | 1 | 1 | 1 | 0 | 1 | 1 | 1 | 1 | 0 | 0 | 1 |
| 0 | 0 | 1 | 1 | 1 | 1 | 1 | 0 | 0 | 0 | 1 | 1 | 0 |
|   |   | 1 | 1 | 0 | 0 | 0 | 1 | 0 | 0 | 0 | 1 | 0 |
|   |   | 1 | 0 | 0 | 0 | 1 | 0 | 0 | 0 | 1 | 0 | 0 |
|   |   | 0 | 0 | 0 | 0 | 0 | 0 | 0 | 0 | 0 | 0 | 0 |
|   |   | 0 | 0 | 0 | 0 | 0 | 0 | 0 | 0 | 0 | 0 | 0 |
| 0 | 1 | 1 | 0 | 0 | 0 | 0 | 0 | 0 | 0 | 0 | 0 | 0 |
|   |   | 1 | 0 | 0 | 0 | 0 | 0 | 0 | 0 | 0 | 1 | 0 |
|   |   | 1 | 0 | 0 | 0 | 0 | 0 | 0 | 0 | 0 | 1 | 1 |
|   |   | 1 | 1 | 1 | 0 | 0 | 0 | 0 | 0 | 0 | 0 | 0 |
|   |   | 1 | 0 | 0 | 0 | 0 | 0 | 0 | 0 | 0 | 0 | 1 |
| 1 | 1 | 0 | 0 | 0 | 0 | 0 | 0 | 0 | 0 | 0 | 0 | 0 |
|   |   | 1 | 0 | 1 | 1 | 1 | 1 | 1 | 0 | 0 | 0 | 0 |
|   |   | 1 | 1 | 1 | 0 | 0 | 1 | 0 | 0 | 0 | 0 | 0 |
|   |   | 1 | 1 | 0 | 1 | 0 | 1 | 0 | 0 | 0 | 0 | 1 |
|   |   | 1 | 0 | 0 | 1 | 0 | 0 | 0 | 0 | 0 | 0 | 0 |
| 1 | 1 | 1 | 1 | 0 | 0 | 0 | 0 | 0 | 1 | 0 | 0 | 0 |
|   |   | 0 | 0 | 0 | 0 | 0 | 0 | 0 | 0 | 0 | 0 | 0 |
|   |   | 1 | 0 | 1 | 0 | 0 | 0 | 0 | 0 | 1 | 0 | 0 |
|   |   | 1 | 0 | 0 | 0 | 0 | 0 | 0 | 0 | 0 | 0 | 0 |
|   |   | 0 | 0 | 0 | 0 | 0 | 0 | 0 | 0 | 0 | 0 | 0 |
| 1 | 1 | 1 | 0 | 0 | 0 | 0 | 0 | 0 | 0 | 0 | 0 | 0 |
|   |   | 1 | 1 | 0 | 1 | 0 | 0 | 0 | 1 | 0 | 0 | 0 |
|   |   | 0 | 0 | 0 | 0 | 0 | 0 | 0 | 0 | 0 | 0 | 0 |
|   |   | 1 | 1 | 0 | 0 | 0 | 0 | 0 | 0 | 0 | 0 | 0 |
| 1 | 1 | 1 | 0 | 0 | 0 | 0 | 0 | 0 | 0 | 0 | 0 | 0 |
|   |   | 1 | 1 | 0 | 1 | 0 | 0 | 0 | 0 | 1 | 0 | 0 |
|   |   | 0 | 0 | 0 | 0 | 0 | 0 | 0 | 0 | 0 | 0 | 0 |
|   |   | 1 | 1 | 0 | 0 | 0 | 0 | 0 | 0 | 0 | 0 | 0 |
|   |   | 1 | 1 | 0 | 0 | 0 | 0 | 0 | 0 | 0 | 0 | 0 |
|   |   | 1 | 1 | 0 | 1 | 0 | 0 | 0 | 0 | 0 | 0 | 0 |

| Proton pump inhibitors | Steroid | Antiplatelet agents | Prokinetic agents | Drugs for peripheral vascular disorder | Sedative/hypnotics | Concomitant drugs with Invanz | Proton pump inhibitors | H2-blocker | Prokinetic agents | Harnalidge | Albumin | Opioids | Non-steroid anti-inflammatory drug |
|------------------------|---------|---------------------|-------------------|----------------------------------------|--------------------|-------------------------------|------------------------|------------|-------------------|------------|---------|---------|------------------------------------|
| 0                      | 0       | 0                   | 0                 | 0                                      | 0                  | 1                             | 1                      | 0          | 0                 | 0          | 1       | 0       | 0                                  |
| 0                      | 0       | 0                   | 0                 | 0                                      | 0                  | 1                             | 0                      | 0          | 1                 | 0          | 0       | 0       | 0                                  |
| 0                      | 0       | 0                   | 0                 | 0                                      | 0                  | 1                             | 1                      | 0          | 0                 | 0          | 0       | 1       | 0                                  |
| 0                      | 0       | 0                   | 1                 | 0                                      | 0                  | 1                             | 1                      | 0          | 0                 | 0          | 0       | 1       | 1                                  |
| 0                      | 0       | 1                   | 0                 | 0                                      | 0                  | 1                             | 1                      | 1          | 0                 | 0          | 0       | 0       | 0                                  |
| 0                      | 0       | 1                   | 0                 | 1                                      | 0                  | 1                             | 1                      | 0          | 0                 | 0          | 0       | 1       | 0                                  |
| 0                      | 1       | 0                   | 1                 | 0                                      | 1                  | 1                             | 0                      | 1          | 0                 | 0          | 1       | 1       | 0                                  |
| 0                      | 0       | 1                   | 0                 | 0                                      | 0                  | 1                             | 0                      | 1          | 1                 | 0          | 1       | 1       | 0                                  |
| 0                      | 0       | 0                   | 0                 | 0                                      | 0                  | 1                             | 1                      | 0          | 0                 | 0          | 1       | 0       | 0                                  |
| 0                      | 0       | 0                   | 0                 | 0                                      | 0                  | 1                             | 0                      | 0          | 1                 | 0          | 0       | 0       | 0                                  |
| 0                      | 0       | 0                   | 1                 | 0                                      | 0                  | 1                             | 0                      | 0          | 1                 | 0          | 0       | 0       | 0                                  |
| 0                      | 0       | 0                   | 1                 | 0                                      | 0                  | 1                             | 0                      | 1          | 1                 | 0          | 0       | 0       | 0                                  |
| 0                      | 0       | 1                   | 0                 | 1                                      | 1                  | 1                             | 1                      | 1          | 1                 | 1          | 0       | 0       | 0                                  |
| 0                      | 0       | 0                   | 0                 | 0                                      | 0                  | 1                             | 0                      | 1          | 1                 | 0          | 1       | 0       | 0                                  |
| 0                      | 0       | 0                   | 0                 | 0                                      | 0                  | 1                             | 1                      | 0          | 0                 | 0          | 0       | 0       | 0                                  |
| 0                      | 1       | 0                   | 0                 | 1                                      | 0                  | 1                             | 1                      | 1          | 0                 | 0          | 0       | 0       | 0                                  |
| 0                      | 0       | 0                   | 0                 | 0                                      | 0                  | 1                             | 1                      | 0          | 1                 | 0          | 1       | 1       | 0                                  |
| 0                      | 0       | 0                   | 1                 | 0                                      | 0                  | 1                             | 0                      | 1          | 1                 | 0          | 0       | 0       | 0                                  |
| 0                      | 0       | 0                   | 0                 | 0                                      | 0                  | 1                             | 0                      | 1          | 0                 | 0          | 0       | 0       | 0                                  |
| 1                      | 1       | 1                   | 0                 | 0                                      | 0                  | 1                             | 1                      | 0          | 0                 | 0          | 0       | 1       | 0                                  |
| 0                      | 0       | 0                   | 0                 | 0                                      | 0                  | 1                             | 1                      | 0          | 0                 | 1          | 0       | 0       | 0                                  |
| 0                      | 0       | 0                   | 0                 | 1                                      | 0                  | 1                             | 1                      | 0          | 0                 | 1          | 0       | 0       | 0                                  |
| 0                      | 0       | 0                   | 0                 | 0                                      | 0                  | 1                             | 0                      | 0          | 0                 | 0          | 0       | 0       | 1                                  |
| 1                      | 0       | 0                   | 0                 | 0                                      | 0                  | 1                             | 0                      | 0          | 0                 | 0          | 0       | 1       | 1                                  |
| 0                      | 0       | 0                   | 0                 | 0                                      | 0                  | 1                             | 0                      | 0          | 0                 | 0          | 0       | 0       | 0                                  |
| 0                      | 0       | 0                   | 1                 | 1                                      | 0                  | 1                             | 0                      | 1          | 1                 | 0          | 0       | 0       | 0                                  |
| 0                      | 0       | 1                   | 0                 | 0                                      | 0                  | 1                             | 1                      | 1          | 1                 | 0          | 1       | 1       | 0                                  |
| 0                      | 0       | 0                   | 0                 | 0                                      | 0                  | 1                             | 0                      | 0          | 0                 | 1          | 0       | 0       | 0                                  |
| 1                      | 0       | 0                   | 0                 | 0                                      | 1                  | 1                             | 1                      | 0          | 0                 | 0          | 1       | 0       | 0                                  |
| 0                      | 0       | 0                   | 0                 | 0                                      | 0                  | 1                             | 0                      | 1          | 0                 | 0          | 0       | 0       | 0                                  |
| 0                      | 0       | 0                   | 0                 | 0                                      | 0                  | 1                             | 0                      | 1          | 1                 | 0          | 0       | 0       | 0                                  |
| 0                      | 0       | 0                   | 0                 | 0                                      | 0                  | 1                             | 1                      | 0          | 1                 | 1          | 0       | 0       | 1                                  |
| 1                      | 1       | 0                   | 1                 | 0                                      | 0                  | 1                             | 1                      | 0          | 0                 | 0          | 0       | 0       | 0                                  |
| 0                      | 0       | 0                   | 0                 | 0                                      | 1                  | 1                             | 0                      | 1          | 0                 | 0          | 0       | 1       | 0                                  |
| 0                      | 1       | 0                   | 0                 | 0                                      | 0                  | 1                             | 0                      | 0          | 0                 | 0          | 0       | 0       | 0                                  |
| 0                      | 1       | 1                   | 0                 | 1                                      | 0                  | 1                             | 1                      | 0          | 0                 | 0          | 0       | 0       | 0                                  |
| 0                      | 0       | 0                   | 0                 | 0                                      | 0                  | 1                             | 0                      | 0          | 1                 | 0          | 0       | 0       | 0                                  |
| 0                      | 0       | 0                   | 1                 | 1                                      | 0                  | 1                             | 0                      | 0          | 0                 | 0          | 1       | 0       | 0                                  |

|   |   |   |   |   |   |   |   |   |   |   |   |   |   |   |
|---|---|---|---|---|---|---|---|---|---|---|---|---|---|---|
| 1 | 0 | 0 | 0 | 0 | 0 | 0 | 1 | 1 | 0 | 0 | 0 | 0 | 0 | 0 |
| 0 | 0 | 1 | 0 | 0 | 0 | 0 | 1 | 0 | 0 | 0 | 0 | 0 | 0 | 0 |
| 0 | 0 | 0 | 0 | 0 | 0 | 0 | 1 | 0 | 1 | 0 | 0 | 1 | 1 | 0 |
| 0 | 0 | 0 | 0 | 0 | 0 | 0 | 1 | 0 | 0 | 0 | 1 | 1 | 0 | 0 |
| 0 | 0 | 0 | 0 | 0 | 0 | 0 | 1 | 0 | 0 | 0 | 0 | 0 | 0 | 0 |
| 0 | 1 | 0 | 0 | 0 | 0 | 1 | 1 | 0 | 1 | 1 | 0 | 1 | 0 | 0 |
| 0 | 0 | 0 | 0 | 0 | 0 | 0 | 1 | 0 | 0 | 0 | 0 | 0 | 1 | 0 |
| 1 | 0 | 0 | 0 | 0 | 0 | 1 | 1 | 0 | 0 | 0 | 1 | 0 | 1 | 0 |
| 0 | 1 | 0 | 0 | 0 | 0 | 0 | 1 | 1 | 1 | 1 | 0 | 0 | 1 | 0 |
| 0 | 0 | 1 | 0 | 0 | 0 | 0 | 1 | 1 | 1 | 0 | 0 | 0 | 0 | 0 |
| 1 | 0 | 0 | 0 | 0 | 0 | 0 | 1 | 1 | 0 | 0 | 0 | 1 | 0 | 0 |
| 0 | 0 | 1 | 0 | 0 | 0 | 0 | 1 | 1 | 0 | 0 | 0 | 0 | 0 | 0 |
| 0 | 0 | 1 | 0 | 0 | 0 | 0 | 1 | 0 | 0 | 0 | 0 | 0 | 0 | 0 |
| 0 | 0 | 0 | 0 | 0 | 0 | 0 | 1 | 1 | 0 | 1 | 0 | 1 | 1 | 0 |
| 0 | 0 | 0 | 0 | 0 | 0 | 0 | 1 | 1 | 0 | 1 | 0 | 1 | 0 | 0 |
| 0 | 0 | 0 | 0 | 0 | 0 | 0 | 1 | 0 | 1 | 1 | 0 | 0 | 1 | 0 |
| 1 | 0 | 1 | 0 | 0 | 0 | 0 | 1 | 1 | 0 | 0 | 0 | 0 | 0 | 0 |
| 0 | 0 | 0 | 0 | 0 | 0 | 0 | 0 | 0 | 0 | 0 | 0 | 0 | 0 | 0 |
| 1 | 0 | 0 | 1 | 0 | 0 | 0 | 1 | 1 | 0 | 1 | 0 | 0 | 0 | 0 |
| 0 | 0 | 0 | 0 | 1 | 1 | 1 | 1 | 0 | 1 | 0 | 0 | 1 | 1 | 0 |
| 0 | 0 | 0 | 0 | 0 | 0 | 0 | 1 | 1 | 0 | 1 | 0 | 0 | 1 | 1 |
| 0 | 0 | 0 | 1 | 0 | 0 | 0 | 1 | 0 | 0 | 1 | 0 | 0 | 0 | 0 |
| 0 | 0 | 0 | 0 | 0 | 0 | 1 | 1 | 0 | 0 | 0 | 0 | 0 | 0 | 1 |
| 1 | 0 | 1 | 1 | 0 | 0 | 0 | 1 | 1 | 0 | 1 | 0 | 0 | 0 | 0 |
| 0 | 0 | 0 | 0 | 0 | 0 | 0 | 1 | 1 | 1 | 0 | 0 | 0 | 1 | 0 |
| 0 | 0 | 1 | 0 | 0 | 0 | 0 | 1 | 0 | 1 | 0 | 1 | 0 | 0 | 0 |
| 0 | 0 | 0 | 0 | 0 | 0 | 0 | 1 | 1 | 1 | 0 | 0 | 1 | 0 | 0 |
| 0 | 0 | 0 | 0 | 0 | 0 | 0 | 1 | 0 | 0 | 0 | 0 | 0 | 0 | 0 |
| 0 | 1 | 0 | 0 | 1 | 1 | 0 | 1 | 1 | 0 | 0 | 0 | 1 | 1 | 0 |
| 0 | 0 | 1 | 1 | 1 | 1 | 1 | 1 | 0 | 1 | 0 | 0 | 0 | 0 | 0 |
| 0 | 0 | 0 | 0 | 0 | 0 | 0 | 1 | 0 | 1 | 0 | 0 | 0 | 0 | 0 |
| 0 | 0 | 0 | 0 | 0 | 0 | 0 | 1 | 0 | 0 | 1 | 0 | 0 | 0 | 0 |
| 0 | 0 | 1 | 0 | 0 | 0 | 0 | 1 | 1 | 0 | 0 | 0 | 0 | 0 | 0 |
| 0 | 0 | 1 | 0 | 0 | 0 | 1 | 1 | 0 | 1 | 1 | 0 | 0 | 0 | 0 |
| 0 | 0 | 1 | 0 | 0 | 0 | 0 | 1 | 0 | 1 | 0 | 0 | 1 | 1 | 0 |
| 0 | 1 | 0 | 1 | 1 | 1 | 0 | 1 | 1 | 0 | 0 | 0 | 0 | 0 | 0 |
| 0 | 0 | 0 | 0 | 0 | 0 | 0 | 1 | 1 | 0 | 1 | 0 | 1 | 0 | 0 |
| 0 | 0 | 0 | 1 | 1 | 0 | 0 | 1 | 0 | 0 | 0 | 0 | 0 | 0 | 0 |
| 0 | 1 | 1 | 0 | 1 | 1 | 0 | 1 | 0 | 0 | 0 | 0 | 0 | 0 | 0 |
| 0 | 0 | 0 | 1 | 0 | 0 | 1 | 1 | 0 | 1 | 1 | 0 | 0 | 0 | 0 |
| 1 | 0 | 1 | 1 | 0 | 0 | 1 | 1 | 0 | 0 | 1 | 0 | 0 | 0 | 0 |
| 0 | 0 | 0 | 0 | 0 | 0 | 0 | 1 | 1 | 0 | 1 | 1 | 0 | 0 | 0 |
| 0 | 0 | 0 | 0 | 0 | 0 | 0 | 1 | 1 | 0 | 1 | 0 | 0 | 1 | 0 |

|   |   |   |   |   |   |   |   |   |   |   |   |   |   |
|---|---|---|---|---|---|---|---|---|---|---|---|---|---|
| 0 | 0 | 0 | 0 | 0 | 0 | 1 | 1 | 0 | 1 | 0 | 1 | 0 | 0 |
| 0 | 0 | 0 | 0 | 0 | 1 | 1 | 0 | 0 | 0 | 0 | 0 | 1 | 0 |
| 0 | 0 | 0 | 0 | 0 | 0 | 1 | 0 | 1 | 1 | 0 | 0 | 0 | 0 |
| 0 | 0 | 0 | 0 | 0 | 0 | 1 | 1 | 1 | 1 | 0 | 1 | 0 | 0 |
| 1 | 1 | 0 | 0 | 0 | 0 | 1 | 1 | 0 | 0 | 0 | 0 | 1 | 0 |
| 0 | 1 | 1 | 0 | 0 | 0 | 1 | 0 | 0 | 0 | 0 | 1 | 1 | 0 |
| 0 | 0 | 0 | 1 | 0 | 1 | 1 | 0 | 1 | 1 | 0 | 1 | 0 | 0 |
| 0 | 0 | 0 | 0 | 0 | 1 | 1 | 1 | 0 | 1 | 0 | 0 | 0 | 0 |
| 0 | 0 | 0 | 0 | 0 | 0 | 1 | 1 | 1 | 1 | 0 | 0 | 1 | 0 |
| 0 | 0 | 0 | 0 | 0 | 0 | 1 | 0 | 1 | 0 | 0 | 0 | 0 | 0 |
| 0 | 0 | 0 | 1 | 1 | 1 | 1 | 1 | 1 | 0 | 1 | 1 | 1 | 0 |
| 0 | 0 | 0 | 0 | 0 | 0 | 0 | 0 | 0 | 0 | 0 | 0 | 0 | 0 |
| 0 | 0 | 1 | 1 | 0 | 1 | 1 | 1 | 1 | 0 | 0 | 0 | 1 | 0 |
| 0 | 0 | 1 | 1 | 0 | 0 | 1 | 0 | 0 | 1 | 0 | 0 | 0 | 0 |
| 0 | 0 | 0 | 0 | 0 | 1 | 1 | 1 | 0 | 0 | 0 | 0 | 0 | 0 |
| 0 | 0 | 0 | 0 | 0 | 1 | 1 | 0 | 0 | 1 | 0 | 0 | 0 | 0 |
| 0 | 0 | 0 | 0 | 0 | 0 | 1 | 0 | 1 | 0 | 0 | 0 | 0 | 0 |
| 0 | 0 | 0 | 0 | 0 | 0 | 1 | 0 | 1 | 0 | 0 | 0 | 0 | 0 |
| 1 | 0 | 0 | 0 | 0 | 0 | 1 | 1 | 1 | 1 | 0 | 1 | 1 | 0 |
| 0 | 0 | 0 | 0 | 0 | 0 | 1 | 0 | 1 | 1 | 0 | 0 | 0 | 0 |
| 1 | 0 | 0 | 0 | 0 | 0 | 1 | 0 | 0 | 0 | 0 | 0 | 0 | 0 |
| 0 | 0 | 1 | 0 | 0 | 0 | 1 | 0 | 0 | 0 | 0 | 0 | 0 | 0 |
| 0 | 0 | 0 | 0 | 0 | 0 | 1 | 0 | 1 | 0 | 0 | 0 | 0 | 0 |
| 0 | 0 | 0 | 0 | 0 | 0 | 1 | 0 | 1 | 0 | 0 | 0 | 0 | 0 |
| 1 | 0 | 0 | 0 | 0 | 0 | 1 | 1 | 1 | 1 | 0 | 1 | 1 | 0 |
| 0 | 0 | 0 | 0 | 0 | 0 | 1 | 0 | 0 | 0 | 1 | 0 | 0 | 0 |
| 0 | 1 | 0 | 0 | 0 | 0 | 1 | 0 | 0 | 1 | 0 | 0 | 0 | 0 |
| 0 | 0 | 0 | 1 | 1 | 1 | 1 | 1 | 0 | 1 | 0 | 0 | 0 | 0 |
| 0 | 0 | 0 | 0 | 0 | 0 | 1 | 1 | 0 | 0 | 0 | 0 | 1 | 0 |
| 0 | 0 | 0 | 1 | 0 | 0 | 1 | 1 | 1 | 1 | 0 | 0 | 0 | 0 |
| 0 | 1 | 0 | 1 | 0 | 0 | 1 | 0 | 0 | 1 | 0 | 0 | 0 | 0 |
| 1 | 0 | 1 | 1 | 0 | 0 | 1 | 1 | 0 | 1 | 0 | 0 | 0 | 0 |
| 0 | 0 | 0 | 0 | 0 | 1 | 1 | 0 | 0 | 0 | 0 | 0 | 0 | 0 |
| 0 | 0 | 0 | 0 | 0 | 0 | 1 | 0 | 1 | 0 | 1 | 0 | 0 | 0 |
| 0 | 0 | 0 | 1 | 0 | 0 | 1 | 1 | 1 | 0 | 1 | 0 | 0 | 0 |
| 0 | 0 | 0 | 1 | 0 | 1 | 1 | 1 | 0 | 0 | 0 | 1 | 0 | 0 |
| 0 | 0 | 0 | 0 | 0 | 0 | 1 | 1 | 1 | 0 | 0 | 1 | 0 | 0 |
| 0 | 0 | 0 | 0 | 0 | 1 | 1 | 0 | 1 | 0 | 1 | 0 | 0 | 0 |
| 1 | 0 | 0 | 0 | 0 | 0 | 1 | 1 | 0 | 0 | 1 | 0 | 1 | 0 |
| 0 | 0 | 0 | 0 | 0 | 0 | 1 | 0 | 0 | 0 | 0 | 0 | 0 | 0 |
| 0 | 0 | 0 | 0 | 0 | 0 | 1 | 1 | 0 | 1 | 0 | 0 | 0 | 0 |
| 1 | 0 | 0 | 1 | 0 | 1 | 1 | 1 | 0 | 0 | 0 | 0 | 0 | 0 |

|   |   |   |   |   |   |   |   |   |   |   |   |   |   |
|---|---|---|---|---|---|---|---|---|---|---|---|---|---|
| 1 | 0 | 1 | 1 | 0 | 1 | 1 | 0 | 0 | 0 | 0 | 0 | 0 | 0 |
| 0 | 0 | 0 | 0 | 0 | 0 | 1 | 0 | 1 | 0 | 0 | 0 | 0 | 0 |
| 0 | 0 | 0 | 1 | 0 | 0 | 1 | 0 | 0 | 1 | 0 | 0 | 0 | 0 |
| 0 | 0 | 0 | 0 | 0 | 0 | 1 | 0 | 1 | 0 | 0 | 0 | 0 | 0 |
| 1 | 1 | 0 | 0 | 0 | 0 | 1 | 0 | 0 | 1 | 0 | 0 | 1 | 0 |
| 0 | 1 | 0 | 0 | 0 | 0 | 1 | 0 | 0 | 1 | 1 | 0 | 0 | 0 |
| 0 | 0 | 0 | 0 | 0 | 0 | 1 | 0 | 1 | 0 | 0 | 0 | 0 | 0 |
| 1 | 0 | 0 | 1 | 0 | 0 | 1 | 0 | 0 | 0 | 0 | 0 | 0 | 0 |
| 0 | 0 | 0 | 0 | 0 | 0 | 1 | 1 | 0 | 0 | 0 | 0 | 0 | 0 |
| 0 | 0 | 0 | 0 | 0 | 0 | 1 | 0 | 0 | 0 | 0 | 0 | 0 | 0 |
| 1 | 0 | 0 | 1 | 0 | 0 | 1 | 1 | 0 | 0 | 0 | 0 | 1 | 0 |
| 0 | 0 | 0 | 0 | 0 | 0 | 1 | 0 | 0 | 0 | 1 | 0 | 0 | 0 |
| 0 | 0 | 0 | 1 | 0 | 1 | 1 | 1 | 0 | 0 | 0 | 0 | 0 | 0 |
| 1 | 0 | 1 | 0 | 0 | 0 | 1 | 1 | 0 | 0 | 0 | 0 | 0 | 0 |
| 1 | 0 | 1 | 1 | 1 | 1 | 1 | 1 | 0 | 0 | 0 | 0 | 0 | 0 |
| 0 | 0 | 0 | 0 | 0 | 0 | 1 | 0 | 0 | 0 | 0 | 0 | 0 | 0 |
| 0 | 0 | 0 | 1 | 0 | 1 | 1 | 0 | 0 | 0 | 0 | 0 | 0 | 0 |
| 0 | 0 | 1 | 1 | 0 | 0 | 1 | 1 | 0 | 1 | 0 | 0 | 1 | 0 |
| 0 | 0 | 1 | 0 | 0 | 0 | 1 | 0 | 0 | 0 | 0 | 0 | 0 | 0 |
| 0 | 0 | 1 | 0 | 1 | 0 | 1 | 0 | 0 | 0 | 0 | 0 | 0 | 0 |
| 0 | 0 | 0 | 0 | 0 | 0 | 1 | 1 | 0 | 0 | 0 | 0 | 1 | 0 |
| 0 | 0 | 0 | 0 | 0 | 0 | 1 | 0 | 1 | 1 | 0 | 0 | 0 | 0 |
| 0 | 0 | 0 | 0 | 0 | 0 | 1 | 0 | 1 | 0 | 0 | 0 | 0 | 0 |
| 0 | 0 | 0 | 0 | 0 | 0 | 1 | 0 | 0 | 0 | 0 | 0 | 0 | 1 |
| 0 | 1 | 1 | 1 | 1 | 0 | 1 | 0 | 1 | 1 | 0 | 0 | 0 | 0 |
| 0 | 0 | 0 | 0 | 1 | 0 | 1 | 0 | 0 | 0 | 0 | 0 | 0 | 0 |
| 0 | 1 | 0 | 0 | 0 | 0 | 1 | 0 | 1 | 1 | 0 | 0 | 1 | 0 |
| 0 | 0 | 0 | 0 | 0 | 0 | 1 | 0 | 1 | 0 | 0 | 1 | 0 | 0 |
| 1 | 0 | 1 | 0 | 0 | 0 | 1 | 1 | 0 | 0 | 0 | 0 | 0 | 0 |
| 1 | 0 | 0 | 0 | 0 | 0 | 1 | 1 | 0 | 0 | 0 | 0 | 0 | 0 |
| 0 | 1 | 1 | 0 | 0 | 0 | 1 | 0 | 0 | 0 | 0 | 0 | 0 | 0 |
| 0 | 0 | 0 | 0 | 1 | 0 | 1 | 1 | 0 | 0 | 0 | 0 | 0 | 0 |
| 0 | 0 | 0 | 0 | 0 | 0 | 1 | 1 | 0 | 0 | 0 | 1 | 0 | 0 |
| 0 | 0 | 0 | 0 | 0 | 0 | 1 | 0 | 0 | 0 | 1 | 0 | 0 | 0 |
| 0 | 0 | 1 | 0 | 0 | 1 | 1 | 0 | 0 | 0 | 0 | 0 | 0 | 1 |
| 0 | 0 | 0 | 1 | 0 | 0 | 1 | 1 | 1 | 0 | 0 | 1 | 0 | 0 |
| 0 | 0 | 0 | 0 | 0 | 0 | 1 | 0 | 1 | 0 | 0 | 0 | 0 | 0 |
| 0 | 0 | 0 | 0 | 0 | 0 | 1 | 0 | 0 | 0 | 0 | 0 | 0 | 0 |
| 0 | 0 | 0 | 0 | 0 | 0 | 1 | 1 | 1 | 0 | 0 | 0 | 1 | 0 |
| 0 | 0 | 0 | 0 | 0 | 0 | 1 | 0 | 1 | 0 | 0 | 0 | 1 | 0 |
| 0 | 0 | 1 | 0 | 0 | 0 | 1 | 0 | 0 | 0 | 0 | 0 | 0 | 0 |
| 1 | 0 | 0 | 1 | 0 | 1 | 1 | 1 | 0 | 0 | 0 | 0 | 0 | 0 |



| Steroid | Inhaled bronchodilator | Beta-blocker | Diuretics | Calcium channel blockers | Statin | Nitrate | Cordarone | Knowful | Antiplatelet agents | Drugs for peripheral vascular disorder | Transamine | Sedative/hypnotics | Antibiotics | Contrast medium |
|---------|------------------------|--------------|-----------|--------------------------|--------|---------|-----------|---------|---------------------|----------------------------------------|------------|--------------------|-------------|-----------------|
| 0       | 1                      | 0            | 1         | 0                        | 0      | 0       | 0         | 0       | 0                   | 0                                      | 0          | 0                  | 0           | 0               |
| 1       | 0                      | 0            | 0         | 1                        | 0      | 0       | 0         | 0       | 0                   | 0                                      | 0          | 0                  | 0           | 1               |
| 0       | 0                      | 0            | 0         | 1                        | 0      | 0       | 0         | 0       | 0                   | 0                                      | 0          | 0                  | 1           | 0               |
| 0       | 0                      | 0            | 0         | 0                        | 0      | 0       | 0         | 0       | 0                   | 0                                      | 0          | 0                  | 0           | 0               |
| 0       | 0                      | 0            | 0         | 0                        | 0      | 0       | 0         | 0       | 0                   | 0                                      | 0          | 0                  | 0           | 1               |
| 0       | 1                      | 0            | 0         | 0                        | 0      | 0       | 0         | 0       | 0                   | 0                                      | 0          | 1                  | 0           | 0               |
| 1       | 0                      | 0            | 1         | 0                        | 0      | 0       | 0         | 0       | 0                   | 0                                      | 1          | 0                  | 1           | 0               |
| 0       | 1                      | 0            | 0         | 0                        | 0      | 0       | 0         | 0       | 0                   | 0                                      | 1          | 1                  | 0           | 0               |
| 0       | 0                      | 0            | 1         | 0                        | 0      | 0       | 0         | 0       | 0                   | 0                                      | 0          | 0                  | 0           | 0               |
| 0       | 0                      | 0            | 0         | 0                        | 0      | 0       | 0         | 0       | 0                   | 0                                      | 0          | 0                  | 0           | 0               |
| 0       | 0                      | 0            | 0         | 0                        | 0      | 0       | 0         | 0       | 0                   | 0                                      | 0          | 0                  | 0           | 0               |
| 0       | 1                      | 0            | 1         | 1                        | 0      | 0       | 0         | 0       | 0                   | 0                                      | 0          | 0                  | 1           | 0               |
| 1       | 1                      | 0            | 0         | 1                        | 0      | 0       | 0         | 0       | 0                   | 1                                      | 0          | 0                  | 1           | 1               |
| 0       | 0                      | 0            | 1         | 0                        | 0      | 1       | 0         | 0       | 1                   | 0                                      | 0          | 0                  | 1           | 0               |
| 0       | 0                      | 0            | 0         | 0                        | 0      | 0       | 0         | 0       | 0                   | 0                                      | 0          | 0                  | 1           | 0               |
| 0       | 0                      | 0            | 0         | 0                        | 0      | 0       | 0         | 0       | 0                   | 0                                      | 0          | 0                  | 0           | 0               |
| 0       | 1                      | 0            | 1         | 0                        | 0      | 0       | 0         | 0       | 0                   | 0                                      | 1          | 1                  | 0           | 1               |
| 0       | 0                      | 0            | 0         | 1                        | 0      | 0       | 0         | 0       | 0                   | 0                                      | 0          | 0                  | 0           | 0               |
| 0       | 0                      | 1            | 0         | 1                        | 0      | 0       | 1         | 1       | 0                   | 0                                      | 0          | 0                  | 0           | 0               |
| 1       | 0                      | 1            | 1         | 1                        | 0      | 0       | 0         | 0       | 0                   | 0                                      | 0          | 0                  | 0           | 0               |
| 0       | 0                      | 1            | 0         | 1                        | 0      | 0       | 0         | 0       | 0                   | 0                                      | 1          | 0                  | 1           | 0               |
| 0       | 0                      | 0            | 1         | 0                        | 0      | 0       | 0         | 0       | 0                   | 0                                      | 0          | 0                  | 0           | 0               |
| 0       | 0                      | 0            | 0         | 1                        | 0      | 0       | 0         | 1       | 1                   | 0                                      | 0          | 0                  | 0           | 0               |
| 0       | 1                      | 0            | 0         | 0                        | 0      | 0       | 0         | 0       | 0                   | 0                                      | 0          | 0                  | 0           | 0               |
| 0       | 1                      | 0            | 0         | 0                        | 0      | 0       | 0         | 0       | 0                   | 0                                      | 1          | 0                  | 0           | 1               |
| 0       | 0                      | 0            | 0         | 1                        | 1      | 0       | 0         | 0       | 0                   | 1                                      | 1          | 0                  | 0           | 0               |
| 0       | 1                      | 0            | 0         | 0                        | 0      | 0       | 0         | 0       | 1                   | 0                                      | 1          | 0                  | 0           | 1               |
| 1       | 1                      | 0            | 0         | 0                        | 0      | 0       | 0         | 0       | 0                   | 0                                      | 0          | 1                  | 0           | 0               |
| 0       | 0                      | 0            | 1         | 0                        | 0      | 0       | 0         | 0       | 1                   | 1                                      | 0          | 0                  | 0           | 1               |
| 1       | 0                      | 0            | 1         | 0                        | 0      | 0       | 1         | 0       | 1                   | 0                                      | 0          | 0                  | 0           | 0               |
| 0       | 0                      | 0            | 1         | 0                        | 0      | 0       | 0         | 0       | 0                   | 0                                      | 0          | 0                  | 0           | 0               |
| 0       | 0                      | 0            | 1         | 1                        | 0      | 0       | 0         | 0       | 0                   | 0                                      | 0          | 0                  | 0           | 0               |
| 0       | 1                      | 0            | 0         | 0                        | 0      | 0       | 0         | 0       | 0                   | 0                                      | 0          | 0                  | 1           | 1               |
| 1       | 1                      | 0            | 0         | 0                        | 0      | 0       | 0         | 0       | 0                   | 0                                      | 0          | 0                  | 0           | 0               |
| 1       | 1                      | 0            | 0         | 0                        | 0      | 0       | 0         | 0       | 0                   | 0                                      | 0          | 0                  | 0           | 0               |
| 1       | 1                      | 0            | 0         | 1                        | 1      | 0       | 0         | 0       | 0                   | 0                                      | 0          | 1                  | 0           | 0               |
| 0       | 1                      | 1            | 0         | 0                        | 0      | 0       | 0         | 0       | 0                   | 0                                      | 0          | 0                  | 0           | 0               |
| 0       | 1                      | 0            | 1         | 0                        | 0      | 1       | 0         | 0       | 0                   | 0                                      | 0          | 0                  | 0           | 0               |
| 0       | 0                      | 0            | 0         | 0                        | 0      | 0       | 0         | 0       | 0                   | 0                                      | 0          | 0                  | 0           | 0               |
| 0       | 1                      | 0            | 1         | 0                        | 0      | 0       | 0         | 1       | 0                   | 0                                      | 0          | 0                  | 1           | 0               |

|   |   |   |   |   |   |   |   |   |   |   |   |   |   |   |
|---|---|---|---|---|---|---|---|---|---|---|---|---|---|---|
| 0 | 0 | 0 | 0 | 0 | 0 | 0 | 0 | 0 | 0 | 0 | 0 | 0 | 1 | 1 |
| 0 | 0 | 0 | 0 | 0 | 0 | 0 | 0 | 0 | 0 | 0 | 0 | 0 | 0 | 0 |
| 1 | 1 | 0 | 1 | 1 | 0 | 0 | 0 | 0 | 0 | 0 | 1 | 1 | 0 | 0 |
| 0 | 0 | 0 | 0 | 0 | 0 | 0 | 0 | 0 | 0 | 0 | 0 | 0 | 0 | 0 |
| 1 | 0 | 1 | 1 | 1 | 0 | 0 | 0 | 0 | 0 | 1 | 0 | 0 | 1 | 0 |
| 1 | 0 | 0 | 1 | 0 | 0 | 0 | 0 | 0 | 0 | 0 | 0 | 0 | 0 | 0 |
| 0 | 0 | 0 | 0 | 0 | 0 | 0 | 0 | 0 | 0 | 0 | 0 | 0 | 0 | 1 |
| 0 | 0 | 1 | 0 | 1 | 0 | 0 | 0 | 0 | 0 | 0 | 0 | 1 | 0 | 0 |
| 1 | 1 | 0 | 0 | 0 | 0 | 0 | 0 | 0 | 0 | 0 | 0 | 0 | 0 | 1 |
| 1 | 0 | 1 | 1 | 1 | 0 | 1 | 0 | 0 | 0 | 0 | 0 | 0 | 0 | 0 |
| 0 | 0 | 0 | 0 | 0 | 0 | 0 | 0 | 0 | 0 | 0 | 0 | 0 | 1 | 0 |
| 0 | 0 | 0 | 0 | 1 | 0 | 0 | 0 | 0 | 1 | 0 | 0 | 0 | 1 | 0 |
| 0 | 1 | 0 | 0 | 0 | 0 | 0 | 0 | 0 | 1 | 0 | 0 | 0 | 0 | 0 |
| 0 | 1 | 0 | 1 | 1 | 0 | 0 | 1 | 0 | 0 | 0 | 1 | 0 | 0 | 0 |
| 0 | 1 | 0 | 0 | 0 | 0 | 0 | 0 | 0 | 0 | 0 | 1 | 0 | 0 | 0 |
| 0 | 1 | 0 | 0 | 0 | 0 | 0 | 0 | 0 | 0 | 0 | 0 | 1 | 0 | 1 |
| 0 | 0 | 0 | 0 | 1 | 1 | 0 | 0 | 0 | 1 | 0 | 0 | 0 | 0 | 0 |
| 0 | 0 | 0 | 0 | 0 | 0 | 0 | 0 | 0 | 0 | 0 | 0 | 0 | 0 | 0 |
| 0 | 0 | 0 | 0 | 0 | 0 | 0 | 0 | 0 | 0 | 0 | 0 | 0 | 1 | 0 |
| 0 | 0 | 0 | 0 | 0 | 0 | 0 | 0 | 0 | 0 | 0 | 0 | 0 | 0 | 0 |
| 0 | 0 | 0 | 0 | 0 | 0 | 0 | 0 | 0 | 0 | 0 | 0 | 0 | 0 | 0 |
| 1 | 1 | 0 | 1 | 1 | 0 | 0 | 0 | 0 | 0 | 0 | 0 | 1 | 0 | 0 |
| 0 | 1 | 0 | 0 | 1 | 0 | 0 | 0 | 0 | 0 | 0 | 0 | 1 | 0 | 0 |
| 1 | 0 | 0 | 0 | 0 | 1 | 0 | 0 | 0 | 1 | 0 | 0 | 1 | 0 | 0 |
| 0 | 0 | 0 | 0 | 0 | 0 | 0 | 0 | 0 | 0 | 0 | 0 | 0 | 0 | 1 |
| 0 | 0 | 0 | 0 | 1 | 0 | 1 | 0 | 1 | 1 | 0 | 1 | 0 | 0 | 0 |
| 0 | 0 | 0 | 1 | 0 | 0 | 0 | 0 | 0 | 0 | 0 | 0 | 0 | 1 | 0 |
| 1 | 0 | 1 | 0 | 1 | 0 | 0 | 0 | 1 | 0 | 0 | 0 | 0 | 0 | 0 |
| 0 | 0 | 0 | 1 | 1 | 0 | 0 | 0 | 0 | 0 | 0 | 1 | 0 | 0 | 0 |
| 1 | 0 | 0 | 1 | 1 | 0 | 0 | 0 | 1 | 1 | 0 | 1 | 0 | 0 | 0 |
| 0 | 0 | 1 | 0 | 0 | 0 | 0 | 1 | 0 | 0 | 0 | 1 | 0 | 0 | 0 |
| 0 | 1 | 0 | 0 | 0 | 0 | 0 | 0 | 0 | 0 | 0 | 0 | 0 | 0 | 0 |
| 0 | 0 | 1 | 1 | 0 | 0 | 1 | 1 | 0 | 0 | 0 | 0 | 0 | 0 | 0 |
| 0 | 0 | 0 | 0 | 1 | 0 | 0 | 0 | 0 | 1 | 0 | 0 | 0 | 0 | 0 |
| 1 | 1 | 0 | 1 | 1 | 1 | 0 | 0 | 0 | 1 | 0 | 0 | 0 | 1 | 0 |
| 1 | 1 | 0 | 1 | 1 | 0 | 0 | 0 | 0 | 0 | 1 | 1 | 0 | 1 | 0 |
| 0 | 0 | 0 | 0 | 0 | 0 | 0 | 0 | 0 | 0 | 0 | 0 | 0 | 0 | 0 |
| 0 | 0 | 1 | 1 | 1 | 0 | 1 | 0 | 1 | 1 | 0 | 0 | 0 | 0 | 0 |
| 1 | 1 | 0 | 0 | 0 | 0 | 0 | 0 | 0 | 0 | 0 | 0 | 0 | 1 | 0 |
| 0 | 0 | 0 | 0 | 0 | 0 | 0 | 0 | 0 | 0 | 0 | 0 | 1 | 0 | 0 |
| 0 | 0 | 1 | 1 | 1 | 0 | 0 | 0 | 1 | 1 | 0 | 0 | 1 | 0 | 0 |
| 0 | 1 | 0 | 1 | 0 | 0 | 1 | 0 | 0 | 0 | 0 | 1 | 0 | 0 | 0 |

|   |   |   |   |   |   |   |   |   |   |   |   |   |   |   |
|---|---|---|---|---|---|---|---|---|---|---|---|---|---|---|
| 1 | 0 | 0 | 1 | 0 | 0 | 0 | 0 | 0 | 0 | 0 | 0 | 0 | 1 | 0 |
| 1 | 1 | 0 | 1 | 0 | 0 | 0 | 0 | 0 | 0 | 0 | 1 | 1 | 0 | 0 |
| 0 | 0 | 1 | 0 | 1 | 0 | 1 | 0 | 0 | 1 | 0 | 0 | 0 | 0 | 0 |
| 1 | 0 | 0 | 0 | 0 | 0 | 0 | 0 | 0 | 0 | 0 | 0 | 0 | 0 | 0 |
| 0 | 0 | 0 | 1 | 0 | 0 | 0 | 0 | 0 | 0 | 0 | 0 | 0 | 0 | 0 |
| 1 | 1 | 0 | 1 | 0 | 0 | 0 | 0 | 0 | 0 | 0 | 0 | 0 | 0 | 0 |
| 0 | 0 | 1 | 0 | 1 | 0 | 0 | 0 | 0 | 0 | 0 | 0 | 1 | 0 | 0 |
| 1 | 0 | 0 | 0 | 1 | 1 | 0 | 0 | 0 | 0 | 0 | 0 | 1 | 0 | 0 |
| 0 | 0 | 0 | 1 | 1 | 0 | 0 | 0 | 0 | 0 | 0 | 1 | 1 | 1 | 0 |
| 1 | 1 | 0 | 0 | 0 | 0 | 0 | 0 | 1 | 0 | 0 | 0 | 1 | 0 | 0 |
| 0 | 0 | 0 | 1 | 0 | 0 | 0 | 0 | 0 | 0 | 0 | 0 | 0 | 0 | 0 |
| 0 | 0 | 0 | 0 | 0 | 0 | 0 | 0 | 0 | 0 | 0 | 0 | 0 | 0 | 0 |
| 1 | 0 | 1 | 1 | 1 | 0 | 0 | 0 | 0 | 1 | 0 | 0 | 0 | 0 | 0 |
| 0 | 1 | 1 | 1 | 1 | 0 | 0 | 0 | 0 | 1 | 0 | 0 | 0 | 0 | 0 |
| 0 | 0 | 0 | 1 | 0 | 0 | 1 | 0 | 0 | 0 | 0 | 0 | 0 | 0 | 0 |
| 0 | 0 | 0 | 1 | 0 | 0 | 0 | 0 | 1 | 0 | 0 | 0 | 1 | 0 | 0 |
| 1 | 1 | 0 | 0 | 1 | 0 | 0 | 0 | 0 | 0 | 0 | 0 | 0 | 0 | 0 |
| 0 | 0 | 0 | 1 | 0 | 0 | 0 | 0 | 0 | 0 | 1 | 0 | 0 | 0 | 0 |
| 0 | 0 | 0 | 0 | 1 | 0 | 0 | 0 | 0 | 0 | 0 | 0 | 1 | 0 | 0 |
| 0 | 1 | 0 | 0 | 1 | 0 | 0 | 0 | 1 | 0 | 0 | 1 | 0 | 0 | 0 |
| 0 | 0 | 0 | 0 | 0 | 0 | 0 | 0 | 0 | 0 | 0 | 0 | 1 | 0 | 0 |
| 1 | 0 | 1 | 0 | 0 | 0 | 0 | 0 | 0 | 1 | 0 | 0 | 1 | 0 | 0 |
| 1 | 1 | 0 | 1 | 1 | 0 | 0 | 0 | 0 | 0 | 0 | 0 | 0 | 0 | 0 |
| 1 | 0 | 0 | 0 | 1 | 0 | 0 | 0 | 0 | 0 | 0 | 0 | 1 | 0 | 0 |
| 1 | 1 | 0 | 1 | 0 | 0 | 0 | 0 | 1 | 0 | 0 | 1 | 0 | 0 | 1 |
| 0 | 1 | 0 | 0 | 0 | 0 | 0 | 0 | 0 | 1 | 0 | 0 | 0 | 0 | 0 |
| 0 | 0 | 0 | 1 | 0 | 0 | 0 | 0 | 0 | 0 | 0 | 0 | 0 | 0 | 1 |
| 1 | 1 | 0 | 0 | 1 | 0 | 0 | 0 | 0 | 0 | 0 | 0 | 0 | 0 | 0 |
| 0 | 0 | 0 | 0 | 0 | 0 | 0 | 0 | 0 | 0 | 0 | 1 | 0 | 0 | 0 |
| 0 | 1 | 0 | 0 | 1 | 0 | 0 | 1 | 0 | 1 | 0 | 0 | 1 | 1 | 0 |
| 1 | 1 | 0 | 1 | 0 | 0 | 0 | 0 | 0 | 0 | 0 | 0 | 0 | 1 | 0 |
| 0 | 0 | 0 | 0 | 0 | 0 | 0 | 0 | 0 | 1 | 0 | 0 | 0 | 0 | 0 |
| 1 | 0 | 0 | 0 | 0 | 0 | 0 | 0 | 0 | 0 | 0 | 0 | 1 | 1 | 1 |
| 0 | 0 | 0 | 0 | 1 | 0 | 0 | 0 | 0 | 0 | 0 | 0 | 0 | 0 | 0 |
| 1 | 1 | 0 | 0 | 1 | 0 | 1 | 0 | 0 | 0 | 0 | 0 | 0 | 0 | 0 |
| 0 | 1 | 0 | 1 | 1 | 0 | 0 | 0 | 0 | 0 | 0 | 0 | 1 | 1 | 1 |
| 0 | 1 | 0 | 0 | 0 | 0 | 0 | 1 | 0 | 0 | 0 | 1 | 0 | 0 | 0 |
| 0 | 1 | 0 | 0 | 0 | 0 | 0 | 0 | 1 | 0 | 0 | 0 | 0 | 0 | 0 |
| 0 | 0 | 1 | 1 | 1 | 0 | 0 | 0 | 0 | 0 | 0 | 0 | 0 | 1 | 0 |
| 0 | 0 | 0 | 0 | 0 | 0 | 0 | 0 | 1 | 0 | 0 | 0 | 1 | 0 | 0 |
| 0 | 1 | 0 | 0 | 0 | 0 | 0 | 0 | 0 | 0 | 0 | 0 | 0 | 0 | 0 |
| 0 | 0 | 0 | 1 | 1 | 0 | 0 | 1 | 0 | 0 | 0 | 0 | 0 | 0 | 0 |
